# Supplementary material for: Redox induced S–S bond cleavage of 2,2′-dithiobisbenzothiazole – leading to a [2Ru-2S] core analogous to [2Fe-2S] cluster
Source: Royal Society of Chemistry journal article supplement (doi:10.1039/d1dt02211c), 2021-01-01
Supplement: d1dt02211c1.pdf [file d1dt02211c1.pdf]

## Supplementary Information

### **Redox induced S-S bond cleavage of 2,2'-dithiobisbenzothiazole - leading to a [2Ru-2S] core analogous to [2Fe-2S] cluster**

Suman Dhara, Sanjib Panda,\* and Goutam Kumar Lahiri\*

Department of Chemistry, Indian Institute of Technology Bombay, Powai, Mumbai-400076,

India

E-mail: [sanjibp@iitb.ac.in](mailto:sanjibp@iitb.ac.in)

[lahiri@chem.iitb.ac.in](mailto:lahiri@chem.iitb.ac.in)

## Table of Contents

|                                                     |         |
|-----------------------------------------------------|---------|
| Experimental                                        | S3-S6   |
| Materials                                           | S3      |
| Physical measurements                               | S3-S4   |
| Crystallography                                     | S4      |
| Computational studies                               | S4      |
| Preparation of complexes                            | S5-S6   |
| ESI(+)-MS/GC-MS spectra of complexes (Fig. S1a-S1b) | S7-S8   |
| Crystal structure of <b>3</b> (Fig. S2)             | S9      |
| NMR spectra of complexes (Fig. S2a-S2g)             | S10-S13 |
| Cyclic voltammograms of DTBT and <b>3</b> (Fig. S3) | S14     |
| Electronic spectra of complexes (Fig. S4)           | S15     |
| Crystallographic parameters (Tables S1-S3)          | S16-S18 |
| EPR data (Table S4)                                 | S19     |
| Electrochemical data (Table S5)                     | S20     |
| Electronic spectral data (Table S6)                 | S21     |
| DFT calculated FMO compositions (Tables S7-S14)     | S22-S33 |
| Cartesian coordinates                               | S34-S48 |
| References                                          | S49     |

## Experimental

**Materials.** The precursor complexes *cis*-Ru(acac)<sub>2</sub>(CH<sub>3</sub>CN)<sub>2</sub><sup>1</sup> and [Ru(Cl)(H)(CO)(PPh<sub>3</sub>)<sub>3</sub>]<sup>2</sup> were prepared according to literature procedures. 2,2'-dithiobisbenzothiazole was purchased from Alfa-Aesar. All other chemicals and reagents were of reagent grade and used as received. For spectroscopic and electrochemical studies, HPLC grade solvents were used.

**Physical measurements.** The electrical conductivity of solutions was checked using an auto-ranging conductivity meter (Toshcon Industries, India). The EPR spectra of isolated complexes and their electrochemically (constant potential coulometry) generated redox species were carried out with a JEOL model FA200 X-band (9.5 GHz) electron spin resonance spectrometer at liquid N<sub>2</sub> temperature using the experimental conditions: frequency, 9.1 GHz; field, 0-5000 G; modulation amplitude, 1 G; modulation frequency, 100 kHz. Cyclic voltammetric and differential pulse voltammetric measurements of the complexes were performed on a PAR model 273A electrochemistry system. Glassy carbon working electrode, platinum wire auxiliary electrode, and a saturated calomel reference electrode (SCE) were used in a standard three-electrode configuration cell. The supporting electrolyte was Bu<sub>4</sub>NPF<sub>6</sub>, and the solute concentration was ~10<sup>-3</sup> M. All electrochemical experiments were carried out under a dinitrogen atmosphere at 298 K with a standard scan rate of 100 mV s<sup>-1</sup>. The half-wave potential  $E^0$  was set equal to 0.5( $E_{pa}$  +  $E_{pc}$ ), where  $E_{pa}$  and  $E_{pc}$  are anodic and cathodic cyclic voltammetry peak potentials, respectively. IR spectra of solid samples (in KBr pellets) in the range 400-4000 cm<sup>-1</sup> was recorded by Bruker Tensor 27 FT-IR spectrophotometer. Absorption spectra were recorded using a Perkin Elmer Lambda 950 spectrophotometer. <sup>1</sup>H/<sup>13</sup>C/<sup>31</sup>P NMR spectra were recorded on a Bruker Avance III 500 MHz or a Bruker Avance III 400 MHz spectrometer. The elemental analyses were recorded using a Perkin-Elmer 240C elemental analyser. Electrospray mass spectrometry (ESI-MS)

was performed on Bruker's Maxis Impact (282001.0008) spectrometer. GC-MS experiments were performed on an Agilent 5975C spectrometer.

**Crystallography.** Single crystals were grown by slow evaporation of dichloromethane/methanol/hexane for **1** and dichloromethane/n-hexane for **2** and **3**. X-ray diffraction data were collected using a Rigaku Saturn-724+ CCD and Bruker D8 quest single crystal diffractometers using Mo-K $\alpha$  or Cu-K $\alpha$  radiation at 150(2) K. The data collection was evaluated using the Crystal Clear-SM Expert software. The data were collected by the standard  $\omega$ -scan technique. The structures were solved by direct methods using SHELXT-2018 and refined by full matrix least-squares with SHELXL-2018, refining on  $F^2$ .<sup>3</sup> All data were corrected for Lorentz and polarisation effects and all non-hydrogen atoms were refined anisotropically. The remaining hydrogen atoms were placed in geometrically constrained positions and refined with isotropic temperature factors, generally 1.2U<sub>eq</sub> of their parent atoms. Hydrogen atoms were included in the refinement process as per the riding model. One toluene molecule and four dichloromethane solvent molecules in the crystals of **1** and **3**, respectively, were masked. The positive residual density around Ru atom in the crystal structure of **1** may be generated due to the poor data of corresponding crystal. CCDC nos. 2082824, 2082825, and 2082826 contain the supplementary crystallographic data for **1**, **2**, and **3**, respectively. These data can be obtained free of charge from The Cambridge Crystallographic Data Centre via [www.ccdc.cam.ac.uk/data\\_request/cif](http://www.ccdc.cam.ac.uk/data_request/cif).

**Computational studies.** Full geometry optimisation as well as the free energy calculation was performed by using the density functional theory method at M06-L level,<sup>4</sup> which was also verified by using (U)B3LYP level of theory.<sup>5</sup> Except ruthenium, all other elements were assigned the 6-31G\*\* basis set. The LANL2DZ basis set with effective core potential was employed for the ruthenium atom.<sup>6</sup> All calculations were performed with Gaussian 09 program package.<sup>7</sup> Calculated structures were visualised with ChemCraft.<sup>8</sup> Calculations of the

fractional contributions of various groups to each molecular orbital were performed by Chemissian 1.7.<sup>9</sup> The zero-point vibrational energies, thermal corrections were obtained from the harmonic frequency calculations.

### Preparation of complexes

**Synthesis of [Ru(L)(acac)<sub>2</sub>(MeOH)], 1 and [(acac)<sub>2</sub>Ru(μ-L)<sub>2</sub>Ru(acac)<sub>2</sub>], 2.** Complexes **1** and **2** were obtained from the reaction of 1 equivalent of 2,2'-dithiobisbenzothiazole (DTBT) and 2 equivalents of [Ru(acac)<sub>2</sub>(CH<sub>3</sub>CN)<sub>2</sub>] in refluxing tetrahydrofuran (20 cm<sup>3</sup>) over a period of 5 h under atmospheric condition. The reaction mixture was then cooled and the solvent was evaporated to dryness under reduced pressure. Purification on a neutral alumina column led to the initial elution of the blue complex (**1**) by 8:2 dichloromethane-pet ether, followed by the yellow complex (**2**) by dichloromethane.

A small quantity of green product corresponding to **1'** was also obtained during column chromatography, which however converted to **2** (blue) in nucleophilic solvents (CH<sub>3</sub>OH, CH<sub>3</sub>CN, THF) due to the molecular strain caused by the four-membered chelate. This indeed restricted its further characterisation except via mass spectrometry.

Preformed complex **1** in CH<sub>2</sub>Cl<sub>2</sub> or toluene was also slowly (~48 h) converted to the dinuclear complex **2**.

**1.** Ru(acac)<sub>2</sub>(CH<sub>3</sub>CN)<sub>2</sub> (100 mg, 0.26 mmol), DTBT (44 mg, 0.13 mmol), yield 70 mg (58%); ESI-MS (+) in CH<sub>3</sub>CN: *m/z* {[**1**]-CH<sub>3</sub>OH +H<sup>+</sup>} calcd 466.98, found 466.96. <sup>1</sup>H NMR (500 MHz, CDCl<sub>3</sub>) [δ/ppm] = 9.78 (s, 1H), 7.46 (s, 1H), 7.01 (s, 1H), 5.32 (s, 1H), 5.03 (s, 1H), 2.30 (s, 1H), -5.91 (s, 1H), -9.16 (s, 3H), -9.94 (s, 3H), -17.68 (s, 3H), -19.01 (s, 3H). Molar conductivity (CH<sub>2</sub>Cl<sub>2</sub>) Λ<sub>M</sub> = 8 Ω<sup>-1</sup> cm<sup>2</sup> M<sup>-1</sup>. Elemental analysis calcd (%) for C<sub>18</sub>H<sub>22</sub>NO<sub>5</sub>S<sub>2</sub>Ru: C, 43.45; H, 4.46; N, 2.82; S, 12.89; found C, 43.64; H, ; N, 3.04; S, 12.72.

**2.** Ru(acac)<sub>2</sub>(CH<sub>3</sub>CN)<sub>2</sub> (100 mg, 0.26 mmol), DTBT (44 mg, 0.13 mmol), yield 30 mg (25%); ESI-MS (+) in CH<sub>3</sub>CN:*m/z* {[**2**]+H<sup>+</sup>} calcd 932.96, found 932.98.<sup>1</sup>H NMR (400 MHz,

CDCl<sub>3</sub>) [ $\delta$ /ppm]= 8.02 (d, 2H), 7.73 (t, 2H), 7.43 (t, 2H), 7.35 (q, 2H), 5.60 (s, 1H), 5.54 (s, 1H), 4.84 (s, 1H), 4.71 (s, 1H), 2.27 (s, 3H), 2.21 (d, 9H), 1.94 (s, 3H), 1.85 (s, 3H), 1.45 (s, 3H), 1.41 (s, 3H). Molar conductivity (CH<sub>2</sub>Cl<sub>2</sub>)  $\Lambda_M = 5 \Omega^{-1} \text{ cm}^2 \text{ M}^{-1}$ . Elemental analysis calcd (%) for C<sub>34</sub>H<sub>36</sub>N<sub>2</sub>O<sub>8</sub>S<sub>4</sub>Ru<sub>2</sub>: C, 43.86; H, 3.90; N, 3.01; S, 13.77; found C, 43.62; H, 3.74; N, 2.94; S, 13.56.

**Synthesis of [Ru<sup>II</sup>(Cl)(L)(CO)(PPh<sub>3</sub>)<sub>2</sub>], **3**.** The metal precursor Ru(Cl)(H)(CO)(PPh<sub>3</sub>)<sub>3</sub> (100 mg, 0.137 mmol) and DTBT (23 mg, 0.068 mmol) were taken in a 20 cm<sup>3</sup> of tetrahydrofuran, and the mixture was stirred magnetically at room temperature for 4 h. The solvent was then evaporated under reduced pressure and purification over a neutral alumina column using 3:2 pet ether-dichloromethane as eluent resulted in **3** as a sole product. Yield: 91 mg (78%); ESI-MS (+) in CH<sub>3</sub>CN:  $m/Z$  {[**3**-Cl<sup>-</sup>]}<sup>+</sup> calcd 820.06, found 820.08. <sup>1</sup>H NMR (400 MHz, CDCl<sub>3</sub>) [ $\delta$ /ppm] = 7.58 (m, 12H), 7.50 (dd, 2H), 7.21–7.08 (m, 19H), 6.87 (m, 2H). <sup>13</sup>C-NMR (100 MHz, CDCl<sub>3</sub>) [ $\delta$ /ppm] = 119.74, 119.80, 122.53, 124.80, 127.76, 129.42, 131.43, 132.12, 132.34, 132.56, 134.19, 149.72, 178.18, 205.66. <sup>31</sup>P NMR (202 MHz, CDCl<sub>3</sub>) [ $\delta$ /ppm] = 37.93. IR (KBr, cm<sup>-1</sup>): 1936 [ $\nu_{\text{C=O}}$ ]. Molar conductivity (CH<sub>2</sub>Cl<sub>2</sub>)  $\Lambda_M = 7 \Omega^{-1} \text{ cm}^2 \text{ M}^{-1}$ . Elemental analysis calcd (%) for C<sub>44</sub>H<sub>34</sub>NOP<sub>2</sub>S<sub>2</sub>RuCl: C, 61.79; H, 4.01; N, 1.64; S, 7.50; found C, 61.56; H, 3.88; N, 1.58; S, 7.64.

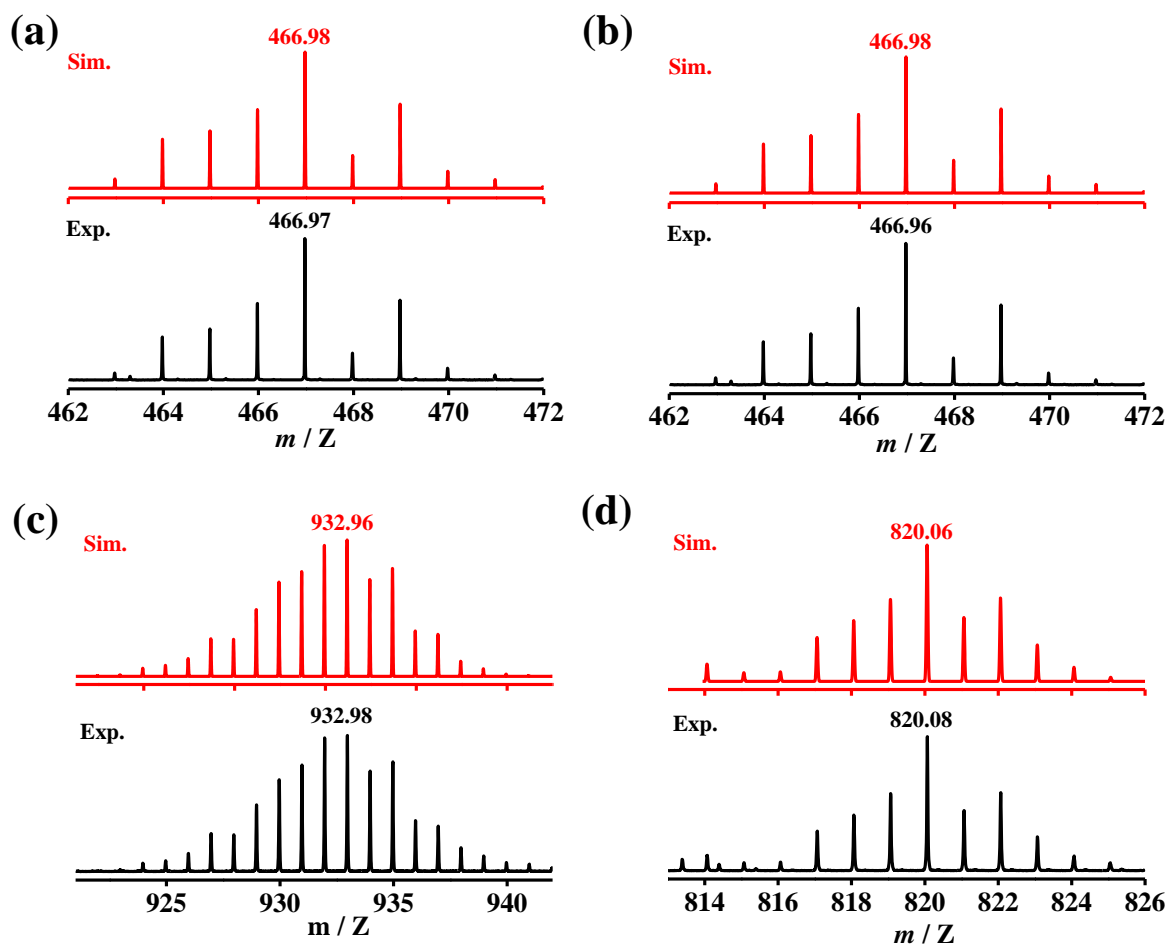

**Fig. S1a** Experimental and simulated ESI(+) mass spectra of (a)  $\{1-\text{CH}_3\text{OH}+\text{H}^+\}$ , (b)  $\{1'+\text{H}^+\}$ , (c)  $\{2+\text{H}^+\}$  and (d)  $\{3-\text{Cl}^-\}^+$ .

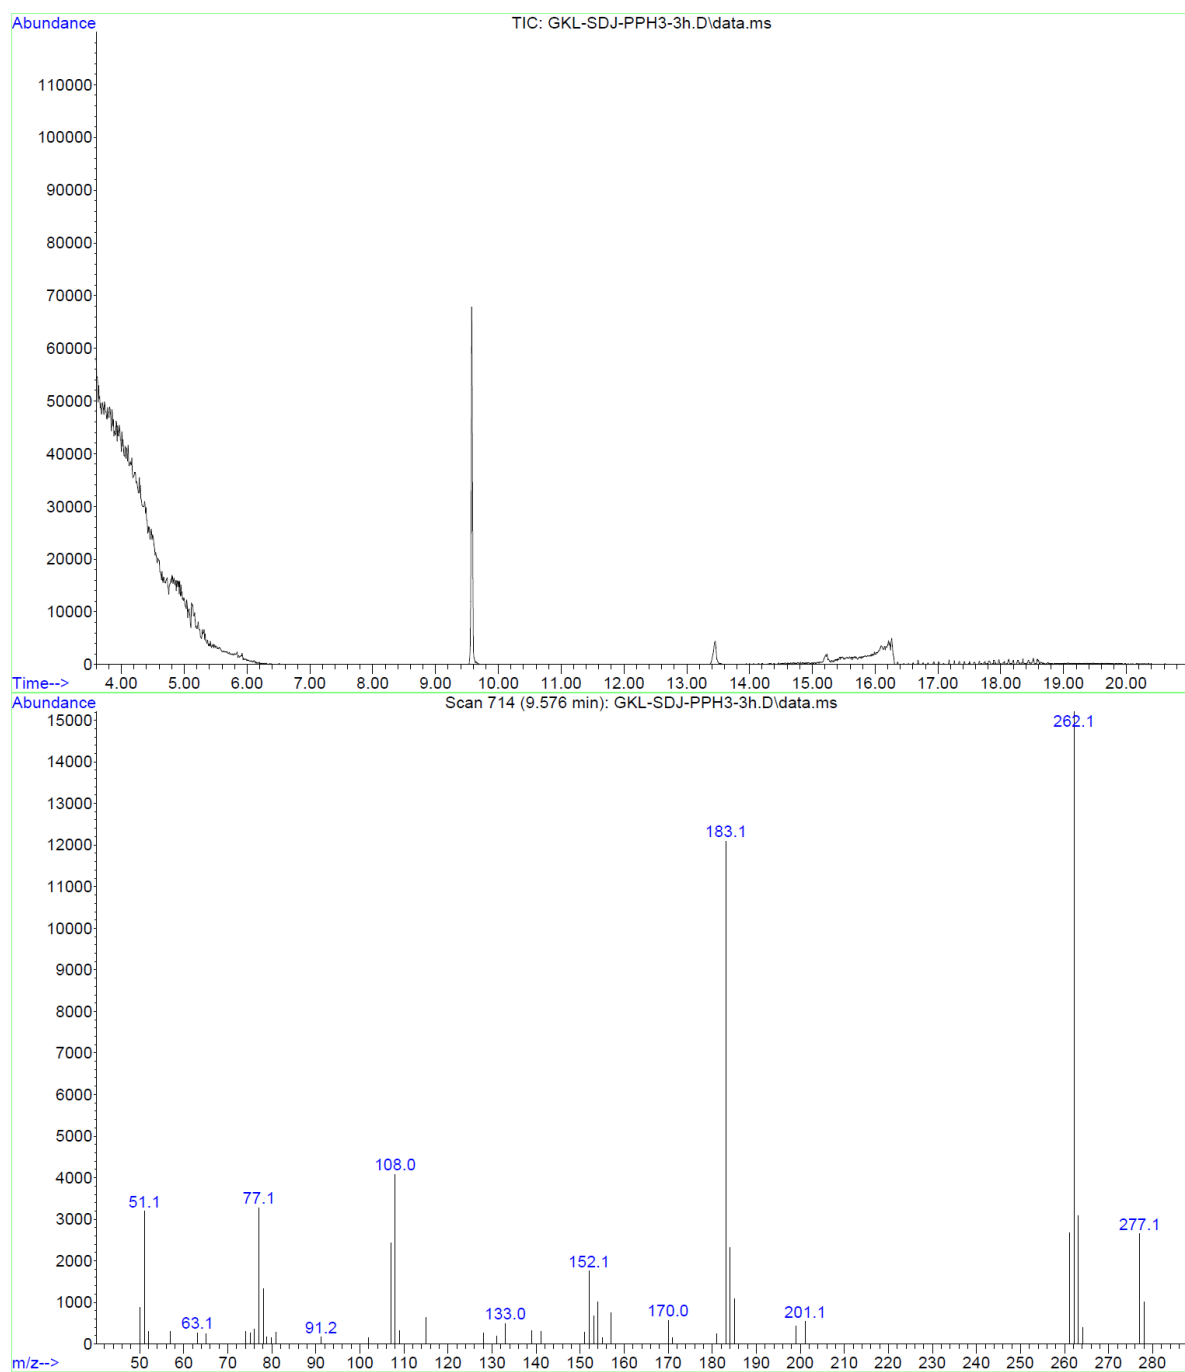

**Fig. S1b** GC-MS spectrum of the crude reaction mixture of **3**. No trace of benzo[d]thiazole-2-thiol at  $m/z=167.24$ .



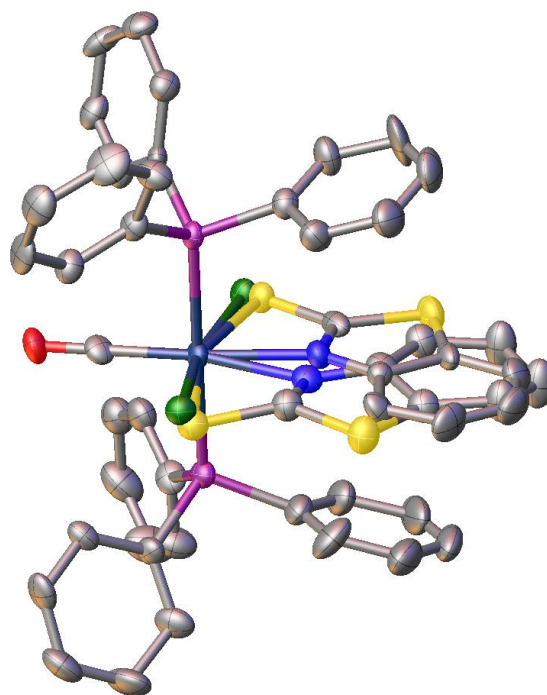

**Fig. S2** Perspective view of **3** at 40% probability level. Hydrogen atoms are omitted for clarity. It showed the disorder involved in the crystal structure.

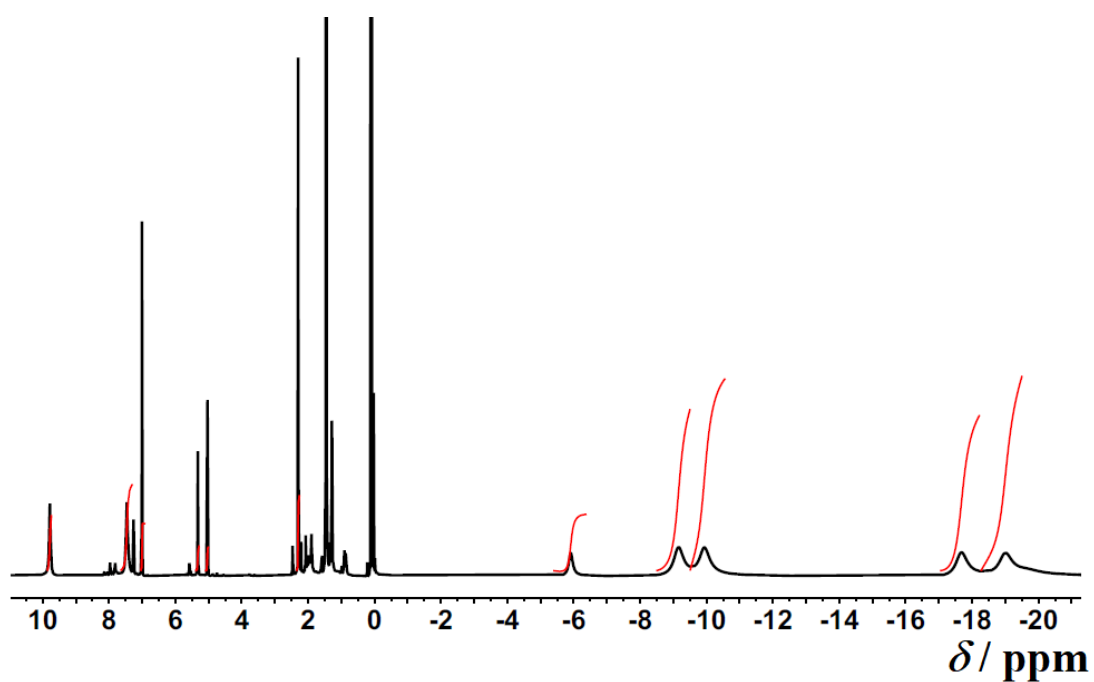

**Fig. S3a**  $^1\text{H}$  NMR of **1** in  $\text{CDCl}_3$  with TMS ( $\delta=0$  ppm) as an internal standard.

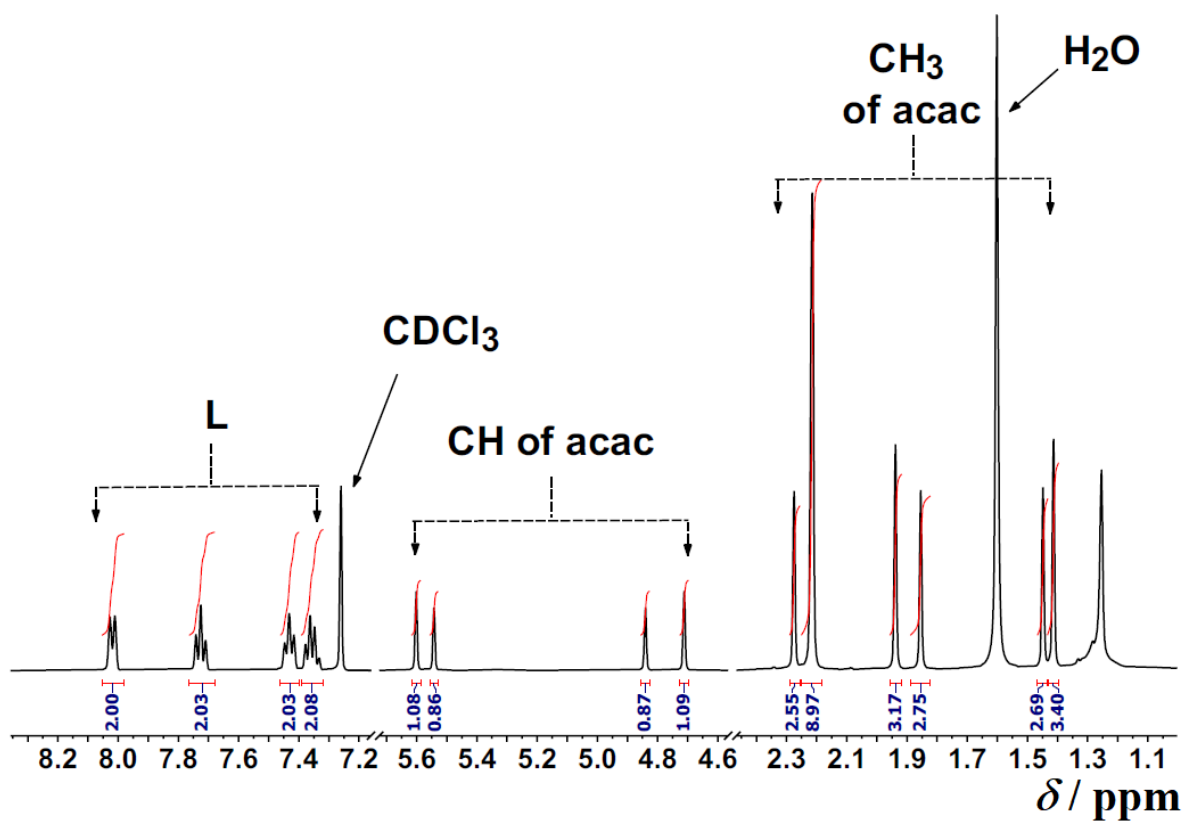

**Fig. S3b**  $^1\text{H}$  NMR of **2** in  $\text{CDCl}_3$  with TMS ( $\delta=0$  ppm) as an internal standard.

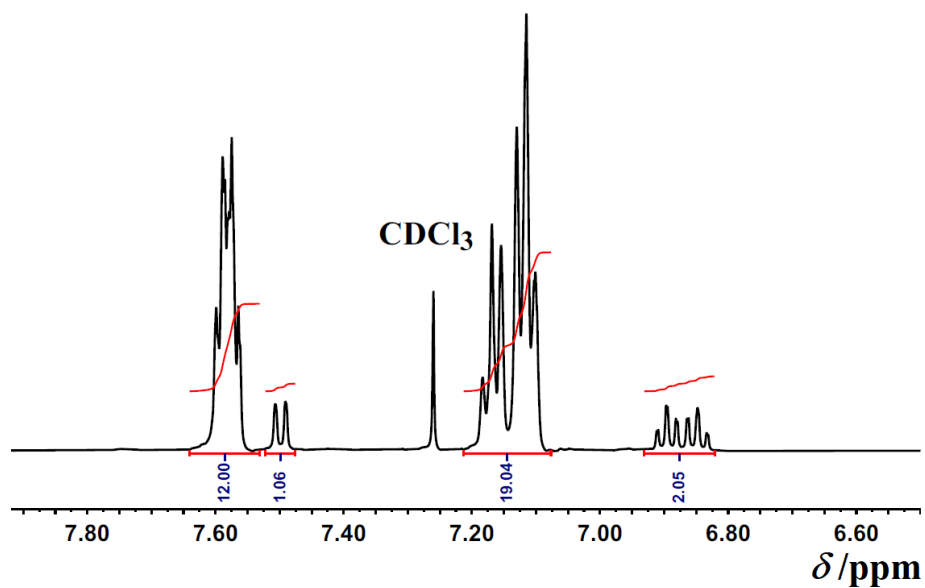

**Fig. S3c** <sup>1</sup>H NMR of **3** in CDCl<sub>3</sub> with TMS ( $\delta$ = 0 ppm) as an internal standard.

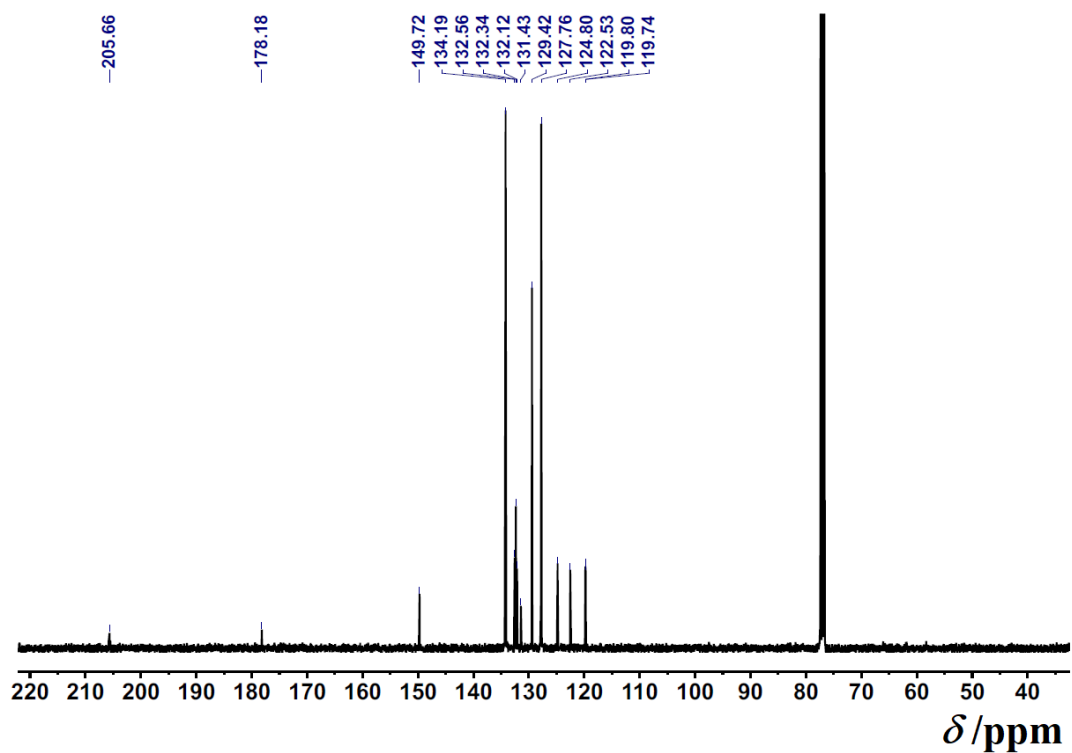

**Fig. S3d** <sup>13</sup>C NMR of **3** in CDCl<sub>3</sub> with TMS ( $\delta$ = 0 ppm) as an internal standard.

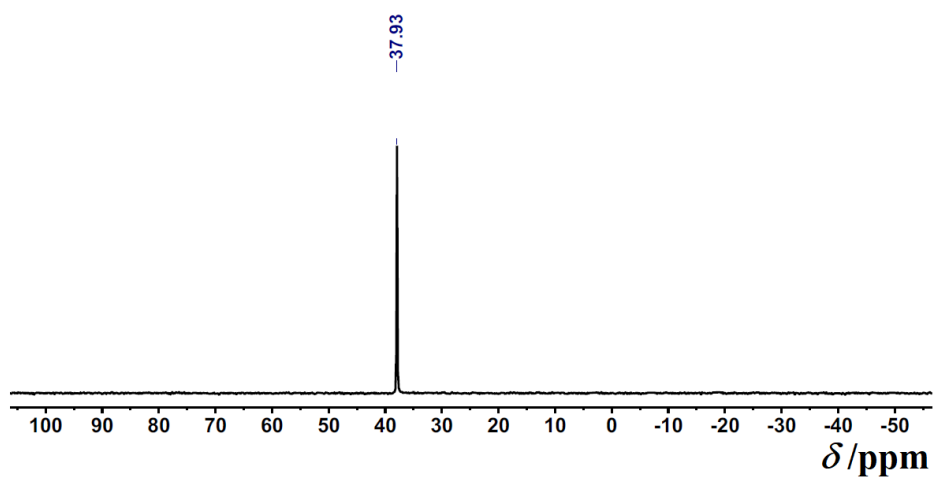

**Fig. S3e**  $^{31}\text{P}$  NMR of **3** in  $\text{CDCl}_3$ .

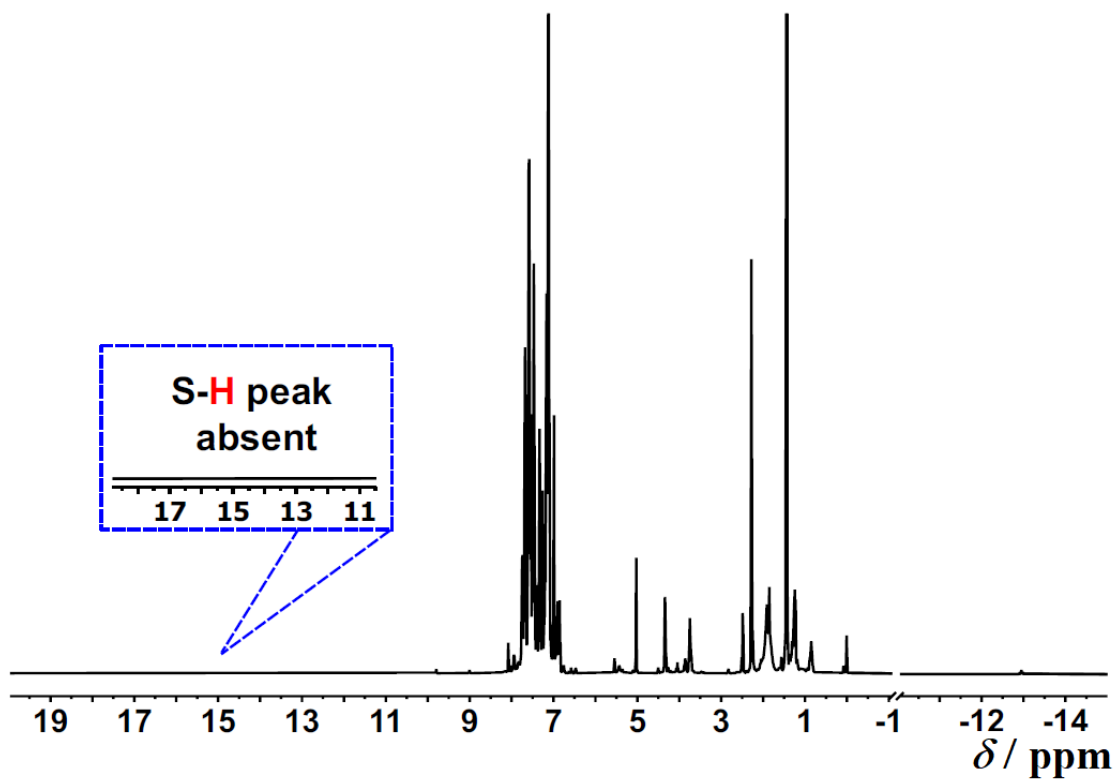

**Fig. S3f**  $^1\text{H}$  NMR of crude reaction mixture of **3** in  $\text{CDCl}_3$ . No trace of  $-\text{SH}$  peak at 13-14 ppm.

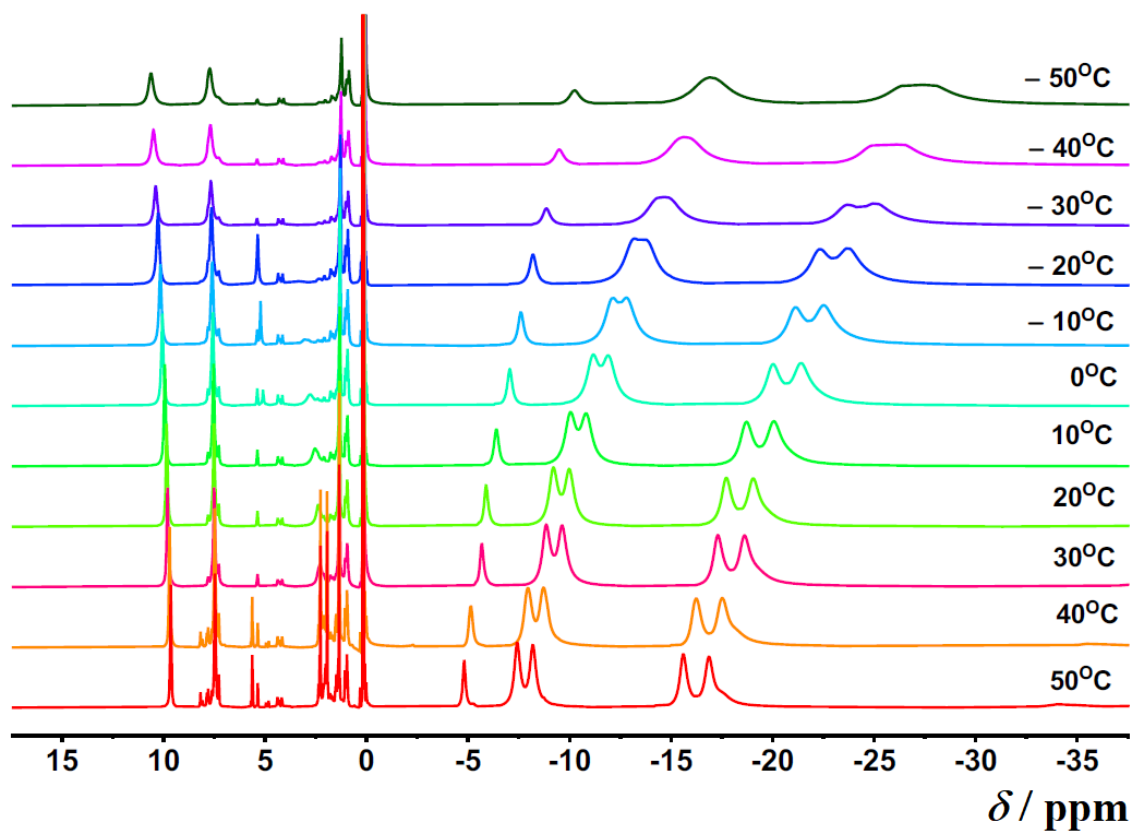

**Fig. S3g** Variable temperature  $^1\text{H}$  NMR of **1** in  $\text{CDCl}_3$  with TMS ( $\delta = 0$  ppm) as an internal standard.

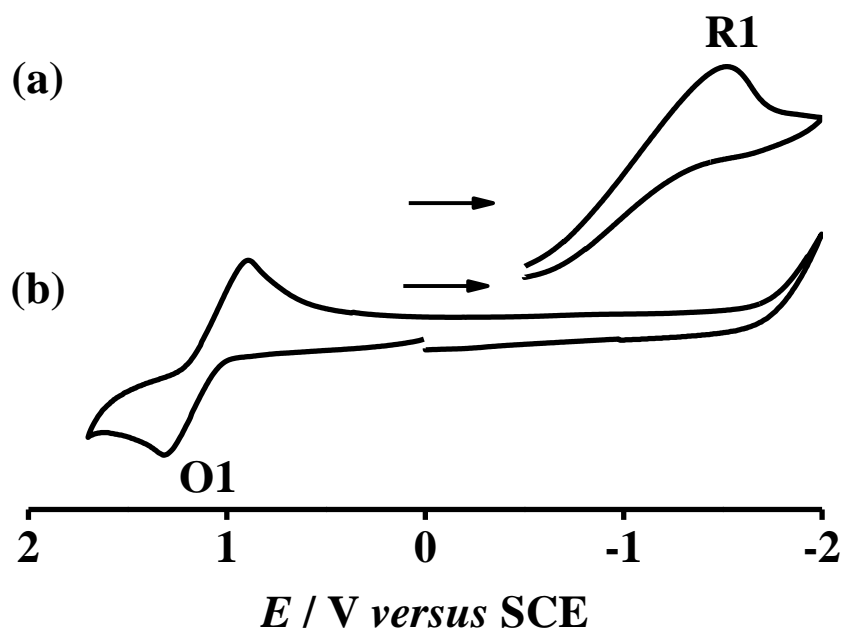

**Fig. S4** Cyclic voltammograms of (a) **DTBT** and (b) **3** in  $\text{CH}_2\text{Cl}_2/0.1\text{M Bu}_4\text{NPF}_6$ .

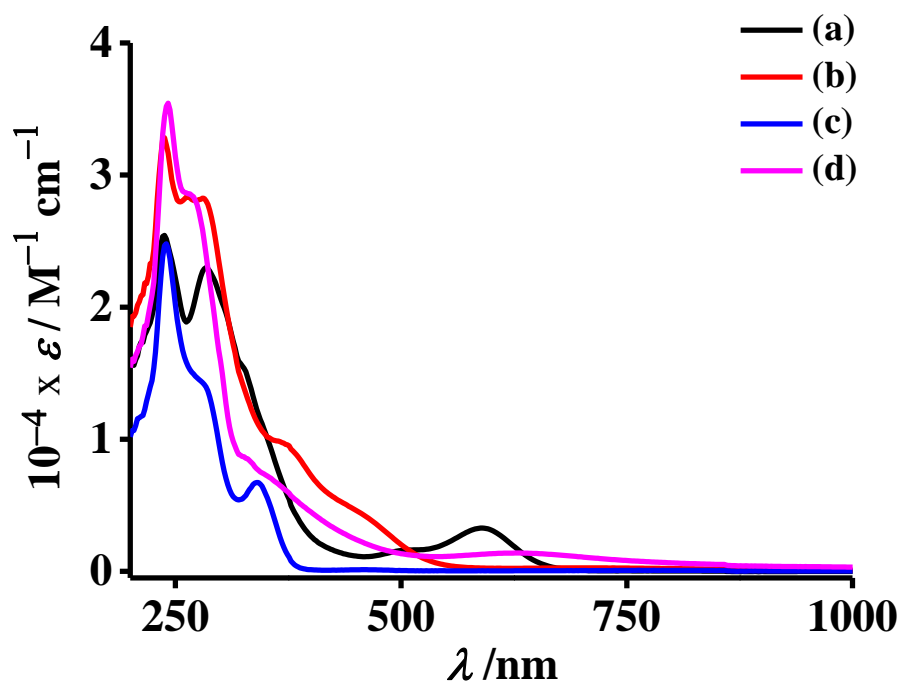

**Fig. S5** Electronic spectra of (a) **1**, (b) **2**, (c) **3** and (d) **2<sup>-</sup>** in CH<sub>2</sub>Cl<sub>2</sub>.

**Table S1** Selected crystallographic data

|                                                                          | <b>1</b>                                                         | <b>2</b>                                                         | <b>3</b>                                                                          |
|--------------------------------------------------------------------------|------------------------------------------------------------------|------------------------------------------------------------------|-----------------------------------------------------------------------------------|
| empirical formula                                                        | C <sub>25</sub> H <sub>30</sub> NO <sub>5</sub> RuS <sub>2</sub> | C <sub>17</sub> H <sub>18</sub> NO <sub>4</sub> RuS <sub>2</sub> | C <sub>48</sub> H <sub>38</sub> Cl <sub>9</sub> NOP <sub>2</sub> RuS <sub>2</sub> |
| formula weight                                                           | 589.718                                                          | 465.51                                                           | 11195.092                                                                         |
| radiation                                                                | CuK $\alpha$                                                     | MoK $\alpha$                                                     | MoK $\alpha$                                                                      |
| crystal system                                                           | orthorhombic                                                     | monoclinic                                                       | monoclinic                                                                        |
| space group                                                              | P 2 <sub>1</sub> 2 <sub>1</sub> 2 <sub>1</sub>                   | C2/c                                                             | P2 <sub>1</sub>                                                                   |
| <i>a</i> (Å)                                                             | 8.1204(5)                                                        | 20.7932(7)                                                       | 11.6447(4)                                                                        |
| <i>b</i> (Å)                                                             | 14.6197(12)                                                      | 9.0294(2)                                                        | 16.6071(5)                                                                        |
| <i>c</i> (Å)                                                             | 22.6698(14)                                                      | 20.3219(5)                                                       | 11.6908(3)                                                                        |
| $\alpha$ (deg)                                                           | 90                                                               | 90                                                               | 90                                                                                |
| $\beta$ (deg)                                                            | 90                                                               | 102.513(3)                                                       | 98.332(3)                                                                         |
| $\gamma$ (deg)                                                           | 90                                                               | 90                                                               | 90                                                                                |
| <i>V</i> (Å <sup>3</sup> )                                               | 2691.3(3)                                                        | 3724.81(18)                                                      | 2236.96(12)                                                                       |
| <i>Z</i>                                                                 | 4                                                                | 8                                                                | 2                                                                                 |
| $\mu$ (mm <sup>-1</sup> )                                                | 6.451                                                            | 1.087                                                            | 1.096                                                                             |
| $\rho_{\text{calcd}}$ (g cm <sup>-3</sup> )                              | 1.455                                                            | 1.660                                                            | 1.774                                                                             |
| Temperature (K)                                                          | 150(2)                                                           | 150(2)                                                           | 150(2)                                                                            |
| <i>F</i> (000)                                                           | 1218.5                                                           | 1880.0                                                           | 1209.4                                                                            |
| $\theta$ range (deg)                                                     | 3.60 to 64.98                                                    | 2.006 to 24.996                                                  | 1.76 to 25                                                                        |
| data/restraints/parameters                                               | 4578/3/252                                                       | 3298/0/230                                                       | 7771/173/569                                                                      |
| <i>R</i> 1, <i>wR</i> <sub>2</sub> [ <i>I</i> > 2 $\sigma$ ( <i>I</i> )] | 0.0736, 0.1841                                                   | 0.0440, 0.1022                                                   | 0.0483, 0.1348                                                                    |
| <i>R</i> 1, <i>wR</i> <sub>2</sub> (all data)                            | 0.0972, 0.2075                                                   | 0.0553, 0.1102                                                   | 0.0489, 0.1356                                                                    |
| <i>GOF</i> on <i>F</i> <sup>2</sup>                                      | 1.005                                                            | 1.073                                                            | 1.039                                                                             |
| largest difference in peak and hole (e Å <sup>-3</sup> )                 | 1.03/-1.14                                                       | 0.92/-0.57                                                       | 0.90/-0.90                                                                        |



**Table S2** Selected experimental bond lengths (Å)

| bond     | 1         | 2          | bond    | 3          |
|----------|-----------|------------|---------|------------|
| Ru1-O1   | 1.998(8)  | 2.043(3)   | Ru1-S1  | 2.426(4)   |
| Ru1-O2   | 2.030(7)  | 2.030(3)   | Ru1-N1  | 2.192(6)   |
| Ru1-O3   | 2.013(7)  | 2.040(3)   | Ru1-C8  | 1.820(5)   |
| Ru1-O4   | 2.036(7)  | 2.049(3)   | Ru1-Cl1 | 2.406(4)   |
| Ru1-O5   | 2.101(7)  | —          | Ru1-P1  | 2.3766(14) |
| Ru1-S1   | 2.275(3)  | 2.2885(13) | Ru1-P2  | 2.3902(14) |
| Ru1-S1'  | —         | 2.2951(13) | S1-C1   | 1.713(8)   |
| S1-C1    | 1.731(10) | 1.772(5)   | C1-S2   | 1.740(6)   |
| C1-S2    | 1.774(10) | 1.734(5)   | C1-N1   | 1.336(10)  |
| C1-N1    | 1.264(13) | 1.295(6)   | S2-C2   | 1.735(8)   |
| S2-C2    | 1.756(12) | 1.736(6)   | C2-C3   | 1.400(10)  |
| C2-C3    | 1.421(15) | 1.399(7)   | C3-C4   | 1.384(13)  |
| C3-C4    | 1.398(16) | 1.402(9)   | C4-C5   | 1.359(13)  |
| C4-C5    | 1.364(17) | 1.392(9)   | C5-C6   | 1.431(10)  |
| C5-C6    | 1.369(16) | 1.373(8)   | C6-C7   | 1.402(11)  |
| C6-C7    | 1.384(16) | 1.405(8)   | C7-N1   | 1.353(9)   |
| C7-N1    | 1.411(14) | 1.386(6)   | C8-O1   | 1.187(7)   |
| O5-C18   | 1.456(14) | —          |         |            |
| Ru1-Ru1' | —         | 2.7773(8)  |         |            |

**Table S3** Selected experimental bond angles (°)

| bond angle | <b>1</b> | bond angle   | <b>2</b>   | bond angle | <b>3</b>   |
|------------|----------|--------------|------------|------------|------------|
| O1-Ru-S1   | 94.8(2)  | O1-Ru1-S1    | 96.44(9)   | P1-Ru1-Cl1 | 89.10(8)   |
| O1-Ru-O3   | 86.8(3)  | O1-Ru1-O3    | 83.04(13)  | P1-Ru1-S1  | 87.66(10)  |
| O1-Ru-O5   | 89.1(3)  | O1-Ru1-O4    | 175.94(13) | P1-Ru1-P2  | 178.66(10) |
| O1-Ru-O4   | 177.2(3) | O1-Ru1-O2    | 93.94(13)  | Cl1-Ru1-S1 | 158.55(10) |
| O1-Ru-O2   | 93.8(3)  | O3-Ru1-S1    | 87.11(10)  | P2-Ru1-Cl1 | 92.22(8)   |
| O3-Ru-S1   | 95.2(2)  | O3-Ru1-O4    | 92.93(13)  | P2-Ru1-S1  | 91.03(10)  |
| O3-Ru-O5   | 87.6(3)  | O2-Ru1-O3    | 83.51(14)  | N1-Ru1-P1  | 88.81(17)  |
| O3-Ru1-O4  | 92.5(3)  | O4-Ru1-S1    | 83.85(9)   | N1-Ru1-Cl1 | 90.8(2)    |
| O3-Ru1-O2  | 174.3(3) | O2-Ru1-S1    | 165.06(10) | N1-Ru1-S1  | 67.9(2)    |
| O5-Ru1-S1  | 175.4(3) | O2-Ru1-O4    | 85.04(13)  | N1-Ru1-P2  | 90.97(17)  |
| O4-Ru1-S1  | 87.9(2)  | S1'-Ru1-Ru1' | 52.60(3)   | C8-Ru1-P1  | 91.03(16)  |
| O4-Ru1-O5  | 88.2(3)  | S1-Ru1-Ru1'  | 52.81(3)   | C8-Ru1-Cl1 | 96.56(19)  |
| O2-Ru1-S1  | 90.5(2)  | Ru1-S1-Ru1'  | 74.59(4)   | C8-Ru1-S1  | 104.69(19) |
| O2-Ru1-O5  | 86.7(3)  |              |            | C8-Ru1-P2  | 89.02(16)  |
| O2-Ru1-O4  | 86.6(3)  |              |            | C8-Ru1-N1  | 172.6(3)   |
|            |          |              |            | O1-C8-Ru1  | 179.1(5)   |

**Table S4** EPR data in CH<sub>2</sub>Cl<sub>2</sub>-toluene (5:1) at 100 K

| Complex                          | $g_1$ | $g_2$ | $g_3$ | $\langle g \rangle^a$ | $\Delta g^b$ |
|----------------------------------|-------|-------|-------|-----------------------|--------------|
| <b>1</b> ( $S=1/2$ )             | 2.290 | 2.151 | 1.880 | 2.114                 | 0.410        |
| <b>2<sup>-</sup></b> ( $S=1/2$ ) | 2.399 | 2.187 | 1.805 | 2.144                 | 0.594        |

$${}^a\langle g \rangle = \left\{ \frac{1}{3}(g_1^2 + g_2^2 + g_3^2) \right\}^{1/2}, {}^b\Delta g = g_1 - g_3.$$

**Table S5** Electrochemical data<sup>a</sup>

| Complex     | $E_{298}^{\circ}/V$ ( $\Delta E/mV$ ) <sup>b</sup> |                    |
|-------------|----------------------------------------------------|--------------------|
|             | Ox1                                                | Red1               |
| <b>DTBT</b> | -                                                  | -1.50 <sup>c</sup> |
| <b>3</b>    | 1.11(400)                                          | -                  |

<sup>a</sup>From cyclic voltammetry in CH<sub>2</sub>Cl<sub>2</sub>/0.1 M Bu<sub>4</sub>NPF<sub>6</sub> at 100 mVs<sup>-1</sup>.

<sup>b</sup>Potentials in V *versus* SCE; peak potential differences  $\Delta E/mV$  (in parentheses).

<sup>c</sup>Irreversible.

**Table S6** Electronic spectral data

| Complex              | $\lambda / \text{nm}$ ( $\epsilon / \text{dm}^3 \text{mol}^{-1} \text{cm}^{-1}$ ) |
|----------------------|-----------------------------------------------------------------------------------|
| <b>1</b>             | 590(3480), 505(1760), 328(15290), 284(23200), 237(25640)                          |
| <b>2</b>             | 453(4600), 374(9810), 281(28350), 263(28490), 237(33000)                          |
| <b>3</b>             | 340(6980), 282(14330), 239(24920)                                                 |
| <b>2<sup>-</sup></b> | 642(1340), 357(7020), 329(8670), 266(28420), 242(35370)                           |

**Table S7** Composition and energies of selected molecular orbitals of **DTBT** ( $S=0$ )

| MO     | Energy(ev) | Composition |                               |
|--------|------------|-------------|-------------------------------|
|        |            | bridge SS   | Rings<br>(rest of the ligand) |
| HOMO-5 | -6.953     | 6           | 94                            |
| HOMO-4 | -6.886     | 40          | 60                            |
| HOMO-3 | -6.074     | 2           | 98                            |
| HOMO-2 | -6.057     | 0           | 100                           |
| HOMO-1 | -5.939     | 15          | 85                            |
| HOMO   | -5.363     | 60          | 40                            |
| LUMO   | -2.811     | 89          | 11                            |
| LUMO+1 | -1.738     | 5           | 95                            |
| LUMO+2 | -1.590     | 11          | 89                            |
| LUMO+3 | -0.966     | 0           | 100                           |
| LUMO+4 | -0.964     | 0           | 100                           |
| LUMO+5 | -0.848     | 7           | 93                            |

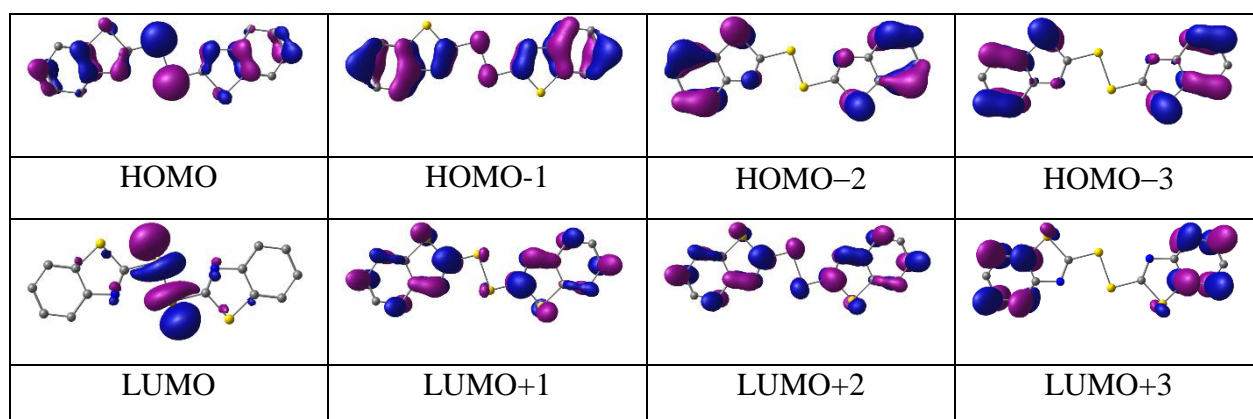

**Table S8** Composition and energies of selected molecular orbitals of **1** ( $S=1/2$ )

| MO             | Energy(ev) | Composition |    |      |
|----------------|------------|-------------|----|------|
|                |            | Ru1         | L  | acac |
| $\alpha$ -spin |            |             |    |      |
| HOMO-5         | -5.751     | 4           | 3  | 92   |
| HOMO-4         | -5.460     | 2           | 95 | 3    |
| HOMO-3         | -5.241     | 12          | 46 | 42   |
| HOMO-2         | -5.122     | 74          | 12 | 14   |
| HOMO-1         | -4.450     | 79          | 1  | 20   |
| HOMO           | -4.369     | 40          | 46 | 15   |
| LUMO           | -2.003     | 50          | 28 | 22   |
| LUMO+1         | -1.789     | 7           | 1  | 92   |
| LUMO+2         | -1.519     | 6           | 2  | 91   |
| LUMO+3         | -1.156     | 55          | 1  | 44   |
| LUMO+4         | -0.969     | 3           | 96 | 2    |
| LUMO+5         | -0.423     | 1           | 98 | 1    |
| $\beta$ -spin  |            |             |    |      |
| HOMO-5         | -5.483     | 11          | 22 | 68   |
| HOMO-4         | -5.652     | 4           | 5  | 91   |
| HOMO-3         | -5.417     | 1           | 98 | 1    |
| HOMO-2         | -5.034     | 9           | 68 | 23   |
| HOMO-1         | -4.803     | 74          | 12 | 14   |
| HOMO           | -4.131     | 80          | 1  | 19   |
| LUMO           | -3.509     | 61          | 25 | 13   |
| LUMO+1         | -1.772     | 4           | 1  | 95   |
| LUMO+2         | -1.588     | 50          | 27 | 23   |
| LUMO+3         | -1.488     | 8           | 3  | 89   |
| LUMO+4         | -0.933     | 3           | 94 | 2    |
| LUMO+5         | -0.670     | 59          | 1  | 40   |

| $\alpha$ -spin                                                                      |                                                                                     |                                                                                      |                                                                                       |
|-------------------------------------------------------------------------------------|-------------------------------------------------------------------------------------|--------------------------------------------------------------------------------------|---------------------------------------------------------------------------------------|
| 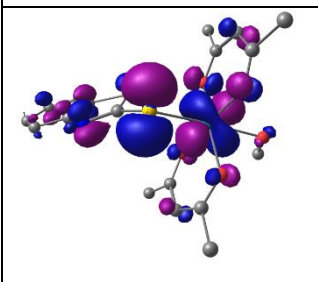   |    |    |    |
| HOMO                                                                                | HOMO-1                                                                              | HOMO-2                                                                               | HOMO-3                                                                                |
|    |    |    |    |
| LUMO                                                                                | LUMO+1                                                                              | LUMO+2                                                                               | LUMO+3                                                                                |
| $\beta$ -spin                                                                       |                                                                                     |                                                                                      |                                                                                       |
|   |   |   |   |
| HOMO                                                                                | HOMO-1                                                                              | HOMO-2                                                                               | HOMO-3                                                                                |
|  |  |  |  |
| LUMO                                                                                | LUMO+1                                                                              | LUMO+2                                                                               | LUMO+3                                                                                |



**Table S9** Composition and energies of selected molecular orbitals of  $\mathbf{1}^+$  ( $S=1$ )

| MO             | Energy(ev) | Composition |    |      |
|----------------|------------|-------------|----|------|
|                |            | Ru1         | L  | acac |
| $\alpha$ -spin |            |             |    |      |
| HOMO-5         | -9.620     | 35          | 56 | 9    |
| HOMO-4         | -9.433     | 41          | 51 | 8    |
| HOMO-3         | -9.097     | 39          | 3  | 58   |
| HOMO-2         | -8.844     | 25          | 29 | 46   |
| HOMO-1         | -8.552     | 2           | 94 | 4    |
| SOMO1          | -8.049     | 19          | 71 | 10   |
| LUMO           | -6.045     | 50          | 28 | 22   |
| LUMO+1         | -5.890     | 46          | 0  | 53   |
| LUMO+2         | -5.232     | 9           | 1  | 90   |
| LUMO+3         | -5.139     | 13          | 1  | 86   |
| LUMO+4         | -4.321     | 1           | 97 | 2    |
| LUMO+5         | -3.450     | 0           | 1  | 99   |
| $\beta$ -spin  |            |             |    |      |
| HOMO-5         | -9.499     | 4           | 85 | 11   |
| HOMO-4         | -9.479     | 9           | 42 | 49   |
| HOMO-3         | -9.335     | 10          | 7  | 83   |
| HOMO-2         | -8.929     | 74          | 12 | 14   |
| HOMO-1         | -8.554     | 6           | 88 | 5    |
| HOMO           | -8.375     | 20          | 59 | 22   |
| LUMO           | -7.882     | 72          | 1  | 27   |
| LUMO+1         | -7.436     | 40          | 46 | 14   |
| LUMO+2         | -5.509     | 18          | 1  | 81   |
| LUMO+3         | -5.414     | 51          | 27 | 22   |
| LUMO+4         | -5.160     | 7           | 2  | 92   |
| LUMO+5         | -4.780     | 47          | 1  | 53   |

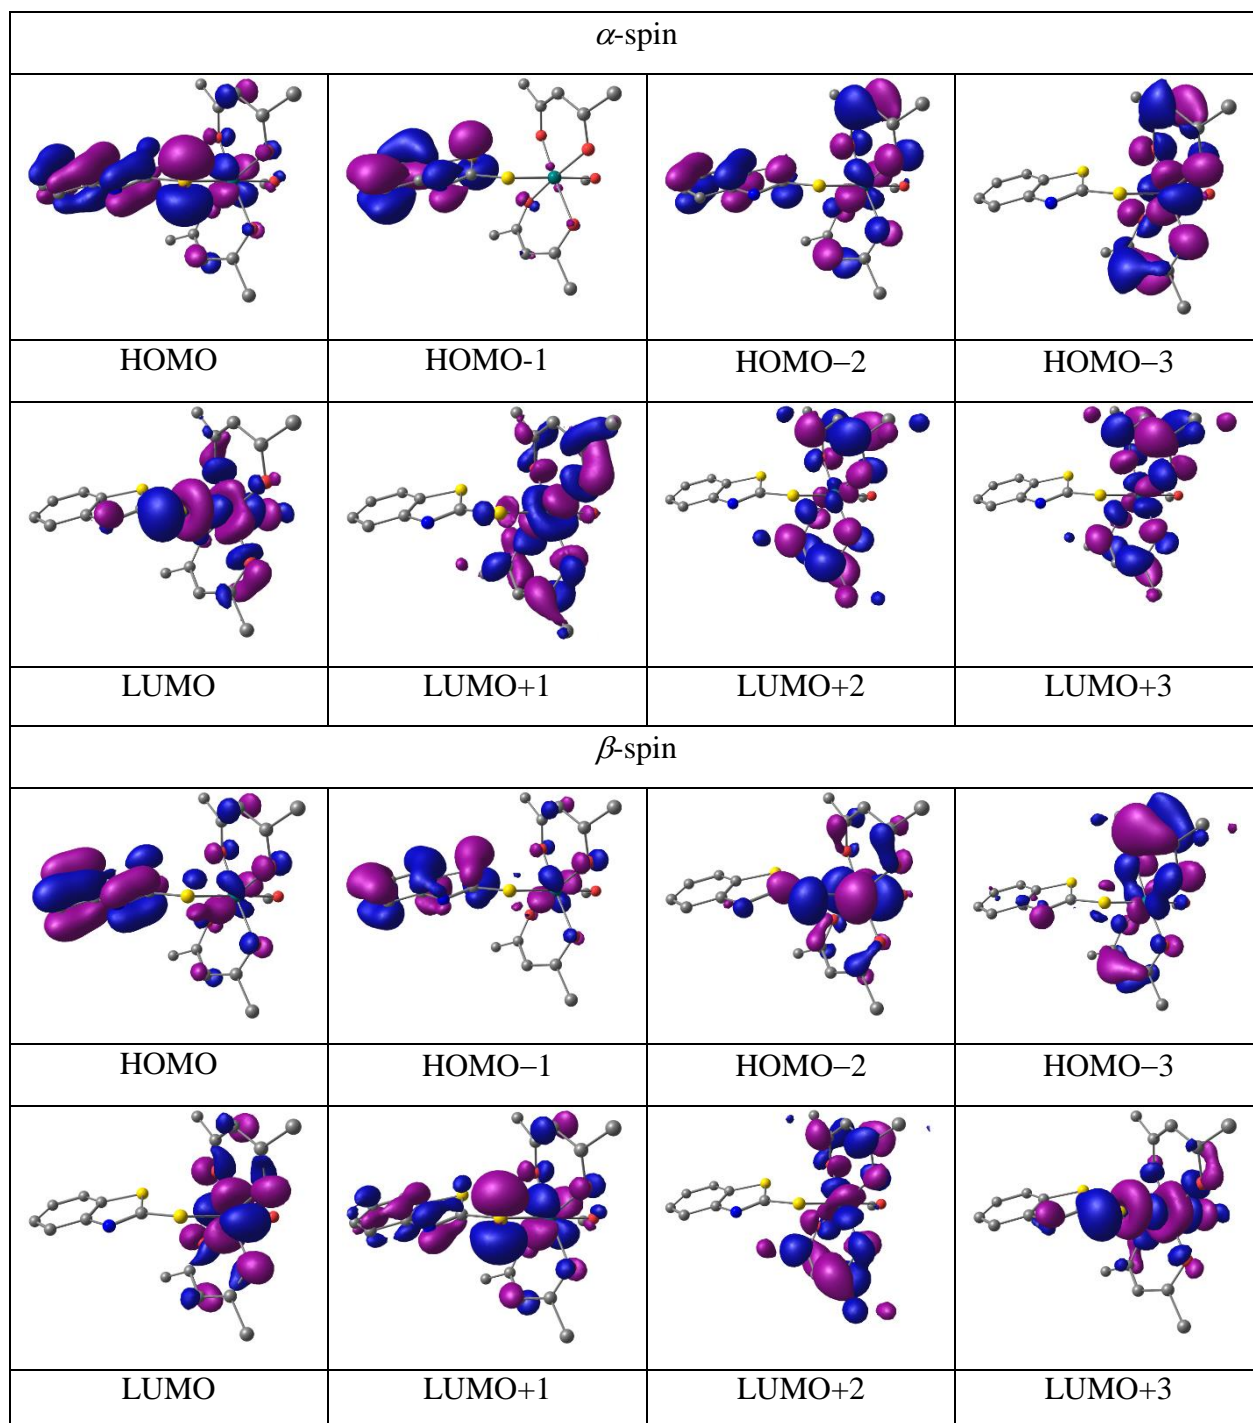

**Table S10** Composition and energies of selected molecular orbitals of  $\mathbf{1}^-$  ( $S=0$ )

| MO     | Energy(ev) | Composition |    |      |
|--------|------------|-------------|----|------|
|        |            | Ru1         | L  | acac |
| HOMO-5 | -2.255     | 4           | 74 | 22   |
| HOMO-4 | -2.128     | 4           | 7  | 89   |
| HOMO-3 | -1.441     | 7           | 72 | 21   |
| HOMO-2 | -0.555     | 71          | 12 | 18   |
| HOMO-1 | 0.239      | 83          | 1  | 16   |
| HOMO   | 0.438      | 66          | 22 | 13   |
| LUMO   | 1.736      | 1           | 1  | 98   |
| LUMO+1 | 2.099      | 12          | 3  | 85   |
| LUMO+2 | 2.299      | 5           | 92 | 2    |
| LUMO+3 | 2.610      | 17          | 76 | 8    |
| LUMO+4 | 2.696      | 40          | 40 | 20   |
| LUMO+5 | 3.213      | 72          | 6  | 21   |

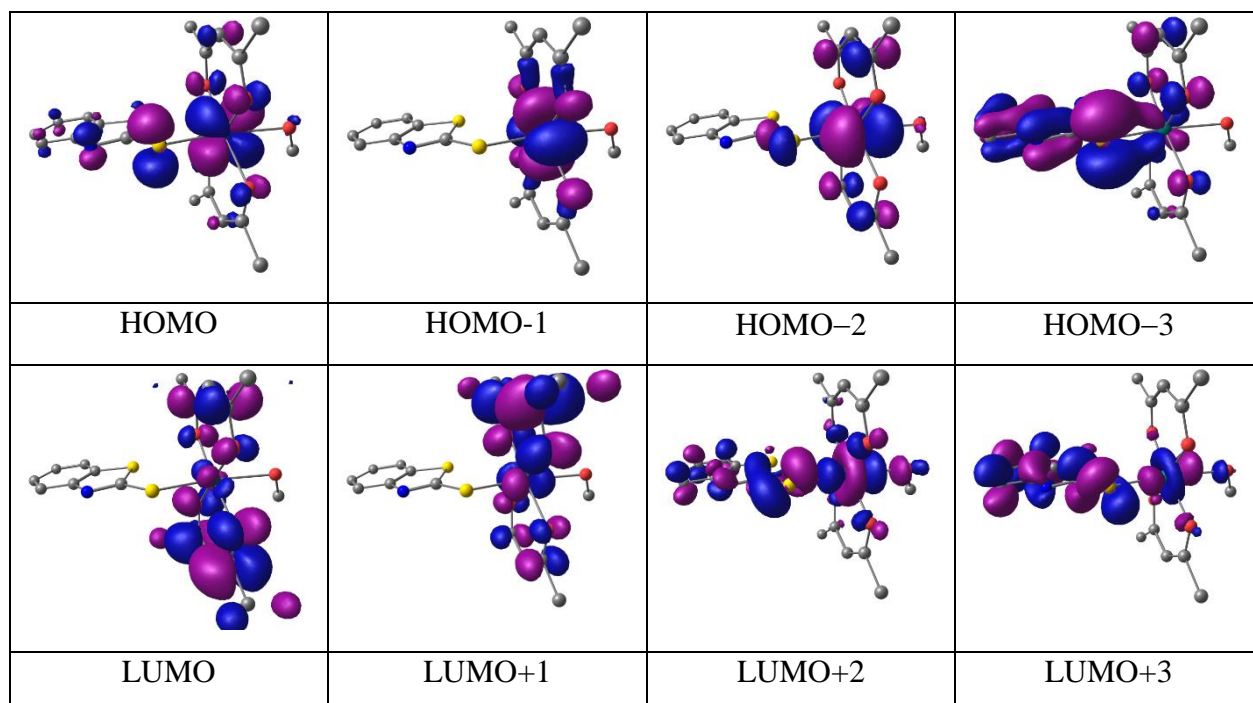

**Table S11** Composition and energies of selected molecular orbitals of **2** ( $S=0$ )

| MO     | Energy(ev) | Composition |     |    |      |
|--------|------------|-------------|-----|----|------|
|        |            | Ru1         | Ru2 | L  | acac |
| HOMO-5 | -5.392     | 5           | 5   | 23 | 67   |
| HOMO-4 | -5.361     | 7           | 7   | 19 | 67   |
| HOMO-3 | -4.983     | 27          | 27  | 11 | 36   |
| HOMO-2 | -4.734     | 37          | 37  | 2  | 24   |
| HOMO-1 | -4.550     | 31          | 31  | 14 | 23   |
| HOMO   | -4.306     | 40          | 40  | 1  | 19   |
| LUMO   | -3.515     | 31          | 31  | 30 | 9    |
| LUMO+1 | -2.502     | 26          | 26  | 25 | 22   |
| LUMO+2 | -1.782     | 20          | 20  | 42 | 18   |
| LUMO+3 | -1.509     | 3           | 3   | 7  | 87   |
| LUMO+4 | -1.508     | 7           | 7   | 10 | 76   |
| LUMO+5 | -1.464     | 13          | 13  | 24 | 50   |

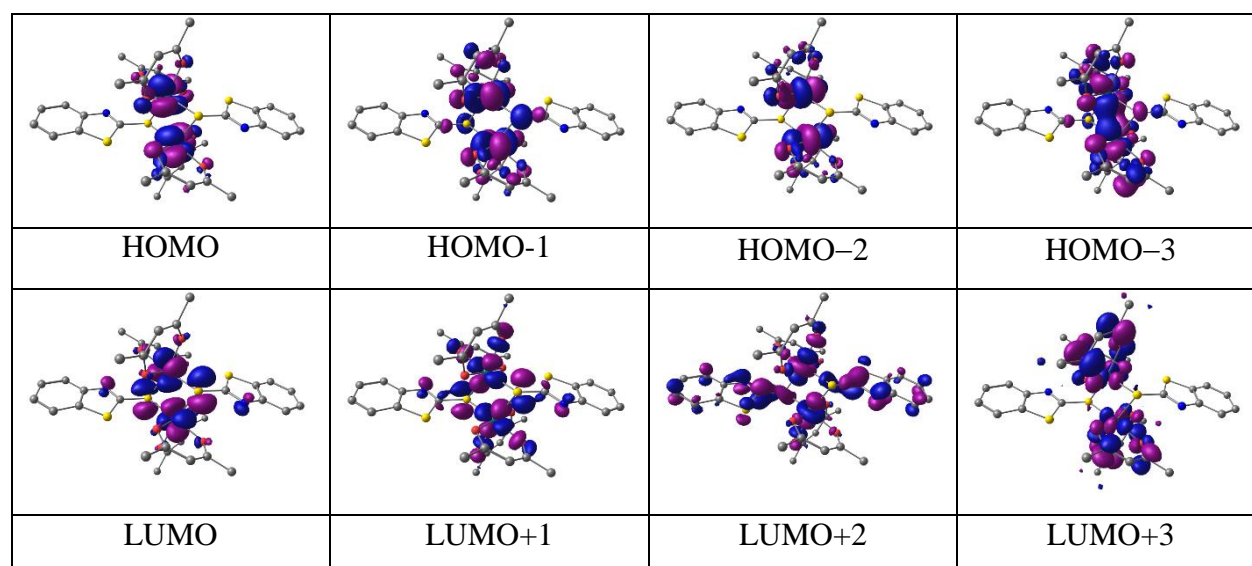

**Table S12** Composition and energies of selected molecular orbitals of  $2^+$  ( $S=1/2$ )

| MO             | Energy(ev) | Composition |     |    |      |
|----------------|------------|-------------|-----|----|------|
|                |            | Ru1         | Ru2 | L  | acac |
| $\alpha$ -spin |            |             |     |    |      |
| HOMO-5         | -8.098     | 1           | 26  | 54 | 19   |
| HOMO-4         | -8.057     | 1           | 2   | 94 | 3    |
| HOMO-3         | -8.016     | 0           | 7   | 70 | 22   |
| HOMO-2         | -7.979     | 2           | 31  | 15 | 52   |
| HOMO-1         | -7.658     | 51          | 7   | 10 | 32   |
| SOMO1          | -7.566     | 58          | 15  | 3  | 24   |
| LUMO           | -6.085     | 38          | 19  | 31 | 11   |
| LUMO+1         | -5.709     | 9           | 40  | 28 | 23   |
| LUMO+2         | -4.988     | 5           | 47  | 12 | 36   |
| LUMO+3         | -4.638     | 18          | 4   | 14 | 63   |
| LUMO+4         | -4.491     | 28          | 6   | 26 | 41   |
| LUMO+5         | -4.457     | 1           | 15  | 6  | 79   |
| $\beta$ -spin  |            |             |     |    |      |
| HOMO-5         | -8.112     | 10          | 7   | 53 | 30   |
| HOMO-4         | -8.055     | 1           | 2   | 93 | 4    |
| HOMO-3         | -8.032     | 3           | 8   | 74 | 15   |
| HOMO-2         | -7.948     | 8           | 32  | 22 | 37   |
| HOMO-1         | -7.637     | 52          | 10  | 6  | 32   |
| HOMO           | -7.484     | 48          | 28  | 2  | 22   |
| LUMO           | -7.248     | 10          | 47  | 11 | 32   |
| LUMO+1         | -6.638     | 31          | 30  | 28 | 11   |
| LUMO+2         | -5.449     | 15          | 36  | 26 | 22   |
| LUMO+3         | -4.703     | 7           | 32  | 11 | 49   |
| LUMO+4         | -4.598     | 11          | 5   | 11 | 73   |
| LUMO+5         | -4.426     | 27          | 9   | 31 | 33   |

| $\alpha$ -spin                                                                      |                                                                                     |                                                                                      |                                                                                       |
|-------------------------------------------------------------------------------------|-------------------------------------------------------------------------------------|--------------------------------------------------------------------------------------|---------------------------------------------------------------------------------------|
| 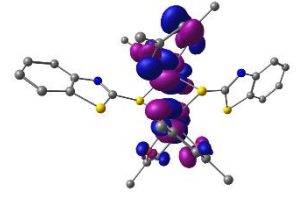   |    |    |    |
| SOMO1                                                                               | HOMO-1                                                                              | HOMO-2                                                                               | HOMO-3                                                                                |
|    |    |    |    |
| LUMO                                                                                | LUMO+1                                                                              | LUMO+2                                                                               | LUMO+3                                                                                |
| $\beta$ -spin                                                                       |                                                                                     |                                                                                      |                                                                                       |
|   |   |   |   |
| HOMO                                                                                | HOMO-1                                                                              | HOMO-2                                                                               | HOMO-3                                                                                |
|  |  |  |  |
| LUMO                                                                                | LUMO+1                                                                              | LUMO+2                                                                               | LUMO+3                                                                                |

**Table S13** Composition and energies of selected molecular orbitals of  $2^-$  ( $S=1/2$ )

| MO             | Energy(ev) | Composition |     |    |      |
|----------------|------------|-------------|-----|----|------|
|                |            | Ru1         | Ru2 | L  | acac |
| $\alpha$ -spin |            |             |     |    |      |
| HOMO-5         | -2.119     | 28          | 28  | 20 | 24   |
| HOMO-4         | -1.625     | 33          | 33  | 12 | 21   |
| HOMO-3         | -1.580     | 40          | 40  | 2  | 19   |
| HOMO-2         | -1.369     | 35          | 35  | 12 | 18   |
| HOMO-1         | -1.327     | 40          | 40  | 1  | 18   |
| HOMO           | -1.060     | 35          | 35  | 17 | 13   |
| LUMO           | 0.574      | 21          | 21  | 41 | 16   |
| LUMO+1         | 0.954      | 14          | 14  | 60 | 11   |
| LUMO+2         | 1.293      | 1           | 1   | 94 | 3    |
| LUMO+3         | 1.321      | 3           | 3   | 2  | 93   |
| LUMO+4         | 1.343      | 5           | 5   | 19 | 71   |
| LUMO+5         | 1.415      | 5           | 5   | 3  | 88   |
| $\beta$ -spin  |            |             |     |    |      |
| HOMO-5         | -2.574     | 2           | 2   | 27 | 69   |
| HOMO-4         | -1.787     | 33          | 33  | 19 | 16   |
| HOMO-3         | -1.438     | 34          | 34  | 13 | 20   |
| HOMO-2         | -1.356     | 40          | 40  | 2  | 18   |
| HOMO-1         | -1.102     | 41          | 41  | 2  | 17   |
| HOMO           | -0.995     | 36          | 36  | 11 | 16   |
| LUMO           | -0.386     | 36          | 36  | 17 | 11   |
| LUMO+1         | 0.731      | 19          | 19  | 48 | 14   |
| LUMO+2         | 1.047      | 11          | 11  | 67 | 11   |
| LUMO+3         | 1.302      | 2           | 2   | 3  | 93   |
| LUMO+4         | 1.341      | 3           | 3   | 2  | 93   |
| LUMO+5         | 1.370      | 3           | 3   | 8  | 86   |

| $\alpha$ -spin                                                                      |                                                                                     |                                                                                      |                                                                                       |
|-------------------------------------------------------------------------------------|-------------------------------------------------------------------------------------|--------------------------------------------------------------------------------------|---------------------------------------------------------------------------------------|
| 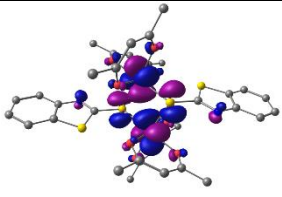   |    |    |    |
| HOMO                                                                                | HOMO-1                                                                              | HOMO-2                                                                               | HOMO-3                                                                                |
|    |    |    |    |
| LUMO                                                                                | LUMO+1                                                                              | LUMO+2                                                                               | LUMO+3                                                                                |
| $\beta$ -spin                                                                       |                                                                                     |                                                                                      |                                                                                       |
|   |   |   |   |
| HOMO                                                                                | HOMO-1                                                                              | HOMO-2                                                                               | HOMO-3                                                                                |
|  |  |  |  |
| LUMO                                                                                | LUMO+1                                                                              | LUMO+2                                                                               | LUMO+3                                                                                |



**Table S14** Composition and energies of selected molecular orbitals of  $2^{2-}$  ( $S=0$ )

| MO     | Energy(ev) | Composition |     |    |      |
|--------|------------|-------------|-----|----|------|
|        |            | Ru1         | Ru2 | L  | acac |
| HOMO-5 | 1.563      | 34          | 34  | 18 | 15   |
| HOMO-4 | 1.704      | 41          | 41  | 2  | 17   |
| HOMO-3 | 1.882      | 34          | 34  | 16 | 16   |
| HOMO-2 | 1.915      | 41          | 41  | 1  | 17   |
| HOMO-1 | 2.106      | 42          | 42  | 3  | 14   |
| HOMO   | 2.189      | 38          | 38  | 12 | 13   |
| LUMO   | 3.489      | 8           | 8   | 78 | 6    |
| LUMO+1 | 3.562      | 7           | 7   | 82 | 4    |
| LUMO+2 | 4.041      | 2           | 2   | 52 | 44   |
| LUMO+3 | 4.057      | 1           | 1   | 95 | 3    |
| LUMO+4 | 4.070      | 2           | 2   | 42 | 54   |
| LUMO+5 | 4.087      | 3           | 3   | 2  | 93   |

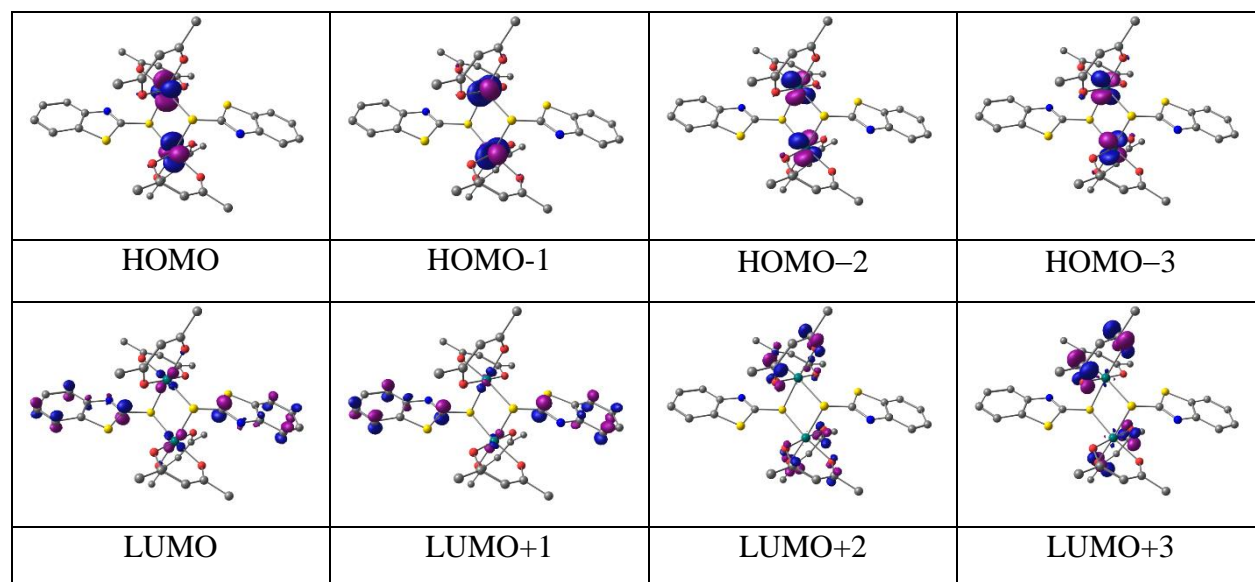

*A. Optimised Cartesian coordinates using M06-L density functional for free energy calculation.*

-----  
**DTBT (S=0)**  
-----

|                                              |                             |
|----------------------------------------------|-----------------------------|
| Zero-point correction=                       | 0.188107 (Hartree/Particle) |
| Thermal correction to Energy=                | 0.204758                    |
| Thermal correction to Enthalpy=              | 0.205702                    |
| Thermal correction to Gibbs Free Energy=     | 0.140998                    |
| Sum of electronic and zero-point Energies=   | -2240.262623                |
| Sum of electronic and thermal Energies=      | -2240.245972                |
| Sum of electronic and thermal Enthalpies=    | -2240.245028                |
| Sum of electronic and thermal Free Energies= | -2240.309732                |

-----

**Cartesian Coordinates**  
-----

|   |             |              |              |
|---|-------------|--------------|--------------|
| S | 7.073196000 | 10.289940000 | 4.390957000  |
| N | 7.793829000 | 11.333219000 | 6.688775000  |
| C | 8.218650000 | 12.206070000 | 5.705823000  |
| C | 8.291303000 | 12.602565000 | 3.289350000  |
| H | 8.059102000 | 12.298931000 | 2.273661000  |
| C | 8.901675000 | 13.403964000 | 5.935235000  |
| H | 9.128448000 | 13.697222000 | 6.955021000  |
| C | 7.195484000 | 10.314372000 | 6.157960000  |
| C | 7.920781000 | 11.818963000 | 4.378587000  |
| C | 8.970188000 | 13.789302000 | 3.541217000  |
| H | 9.269142000 | 14.416181000 | 2.706670000  |
| C | 9.271886000 | 14.184474000 | 4.849947000  |
| H | 9.802572000 | 15.116894000 | 5.017543000  |
| S | 6.475675000 | 8.404092000  | 11.607997000 |
| N | 5.754922000 | 7.360866000  | 9.310194000  |
| C | 5.330042000 | 6.488052000  | 10.293155000 |
| C | 5.257394000 | 6.091569000  | 12.709630000 |
| H | 5.489638000 | 6.395185000  | 13.725314000 |
| C | 4.646911000 | 5.290216000  | 10.063757000 |
| H | 4.420095000 | 4.996977000  | 9.043975000  |
| C | 6.353369000 | 8.379660000  | 9.840995000  |
| C | 5.627962000 | 6.875140000  | 11.620386000 |
| C | 4.578405000 | 4.904888000  | 12.457776000 |
| H | 4.279413000 | 4.278036000  | 13.292329000 |
| C | 4.276651000 | 4.509740000  | 11.149052000 |
| H | 3.745883000 | 3.577366000  | 10.981467000 |
| S | 7.039019000 | 9.718693000  | 8.950114000  |
| S | 6.509907000 | 8.975295000  | 7.048833000  |

---

**L• (S=1/2)**

---

|                                              |                             |
|----------------------------------------------|-----------------------------|
| Zero-point correction=                       | 0.092367 (Hartree/Particle) |
| Thermal correction to Energy=                | 0.100007                    |
| Thermal correction to Enthalpy=              | 0.100952                    |
| Thermal correction to Gibbs Free Energy=     | 0.058576                    |
| Sum of electronic and zero-point Energies=   | -1120.104554                |
| Sum of electronic and thermal Energies=      | -1120.096913                |
| Sum of electronic and thermal Enthalpies=    | -1120.095969                |
| Sum of electronic and thermal Free Energies= | -1120.138345                |

---

Cartesian Coordinates

---

|   |             |              |             |
|---|-------------|--------------|-------------|
| S | 7.119744000 | 10.419045000 | 4.055759000 |
| N | 7.792602000 | 11.361367000 | 6.429134000 |
| C | 8.226183000 | 12.244992000 | 5.507163000 |
| C | 8.369932000 | 12.767700000 | 3.106314000 |
| H | 8.169936000 | 12.524909000 | 2.068139000 |
| C | 8.913964000 | 13.439734000 | 5.816020000 |
| H | 9.110484000 | 13.673211000 | 6.856922000 |
| C | 7.181919000 | 10.320344000 | 5.864994000 |
| C | 7.958873000 | 11.919306000 | 4.134160000 |
| C | 9.043532000 | 13.932143000 | 3.445369000 |
| H | 9.371901000 | 14.602478000 | 2.656338000 |
| C | 9.313836000 | 14.265831000 | 4.790101000 |
| H | 9.844471000 | 15.186459000 | 5.011806000 |
| S | 6.521972000 | 9.009375000  | 6.663966000 |

---

**1 (S=1/2)**

---

|                                              |                             |
|----------------------------------------------|-----------------------------|
| Zero-point correction=                       | 0.376492 (Hartree/Particle) |
| Thermal correction to Energy=                | 0.407028                    |
| Thermal correction to Enthalpy=              | 0.407972                    |
| Thermal correction to Gibbs Free Energy=     | 0.313204                    |
| Sum of electronic and zero-point Energies=   | -2019.920154                |
| Sum of electronic and thermal Energies=      | -2019.889618                |
| Sum of electronic and thermal Enthalpies=    | -2019.888674                |
| Sum of electronic and thermal Free Energies= | -2019.983442                |

---

Cartesian Coordinates

---

|    |             |             |              |
|----|-------------|-------------|--------------|
| Ru | 4.541520000 | 8.131244000 | 16.506028000 |
| S  | 3.538242000 | 6.153511000 | 17.012627000 |
| S  | 2.273769000 | 6.261261000 | 14.166959000 |
| O  | 2.960513000 | 8.930669000 | 15.470990000 |

|   |             |              |              |
|---|-------------|--------------|--------------|
| O | 5.219033000 | 7.385169000  | 14.698923000 |
| O | 5.671043000 | 10.064096000 | 16.187050000 |
| H | 6.367124000 | 10.021177000 | 16.855166000 |
| O | 6.288559000 | 7.553350000  | 17.469551000 |
| O | 3.959860000 | 8.974983000  | 18.299693000 |
| N | 3.003318000 | 4.079969000  | 15.429484000 |
| C | 2.449172000 | 3.683681000  | 14.236975000 |
| C | 1.423644000 | 4.460077000  | 12.152054000 |
| H | 1.075025000 | 5.264104000  | 11.510691000 |
| C | 1.987811000 | 4.730491000  | 13.398948000 |
| C | 2.029250000 | 9.596936000  | 16.047331000 |
| C | 1.314788000 | 3.134401000  | 11.751092000 |
| H | 0.873520000 | 2.905333000  | 10.785111000 |
| C | 2.985095000 | 5.378217000  | 15.546836000 |
| C | 6.163935000 | 6.528580000  | 14.626657000 |
| C | 2.609064000 | 10.140972000 | 19.811943000 |
| H | 2.500698000 | 9.291923000  | 20.492922000 |
| H | 1.710534000 | 10.757060000 | 19.870271000 |
| H | 3.464791000 | 10.720395000 | 20.168838000 |
| C | 8.199490000 | 6.263798000  | 17.878840000 |
| H | 8.703907000 | 7.136833000  | 18.301762000 |
| H | 8.935004000 | 5.627375000  | 17.384319000 |
| H | 7.768401000 | 5.714916000  | 18.721475000 |
| C | 2.876729000 | 9.638485000  | 18.421836000 |
| C | 0.929729000 | 10.034841000 | 15.123966000 |
| H | 1.354551000 | 10.506406000 | 14.234042000 |
| H | 0.230441000 | 10.723640000 | 15.600500000 |
| H | 0.374834000 | 9.156610000  | 14.778560000 |
| C | 1.764483000 | 2.091017000  | 12.573271000 |
| H | 1.667274000 | 1.063618000  | 12.233987000 |
| C | 7.096814000 | 6.700138000  | 16.958290000 |
| C | 6.256303000 | 10.262259000 | 14.897883000 |
| H | 7.019348000 | 9.508006000  | 14.678284000 |
| H | 6.687523000 | 11.265600000 | 14.828381000 |
| H | 5.445949000 | 10.157734000 | 14.176918000 |
| C | 6.308705000 | 5.871627000  | 13.285464000 |
| H | 5.524733000 | 5.113163000  | 13.178715000 |
| H | 7.275839000 | 5.382870000  | 13.155718000 |
| H | 6.151256000 | 6.601505000  | 12.488409000 |
| C | 1.951414000 | 9.931085000  | 17.405262000 |
| H | 1.081089000 | 10.506042000 | 17.704035000 |
| C | 2.331135000 | 2.354153000  | 13.809737000 |
| H | 2.684856000 | 1.558693000  | 14.458402000 |
| C | 7.040999000 | 6.166716000  | 15.663397000 |
| H | 7.799728000 | 5.431942000  | 15.414206000 |

---

2 (S=0)

---

|                                              |                             |
|----------------------------------------------|-----------------------------|
| Zero-point correction=                       | 0.646962 (Hartree/Particle) |
| Thermal correction to Energy=                | 0.700770                    |
| Thermal correction to Enthalpy=              | 0.701715                    |
| Thermal correction to Gibbs Free Energy=     | 0.555634                    |
| Sum of electronic and zero-point Energies=   | -3808.554288                |
| Sum of electronic and thermal Energies=      | -3808.500479                |
| Sum of electronic and thermal Enthalpies=    | -3808.499535                |
| Sum of electronic and thermal Free Energies= | -3808.645616                |

---

Cartesian Coordinates

---

|    |              |             |              |
|----|--------------|-------------|--------------|
| Ru | 9.425470000  | 5.166071000 | 9.714899000  |
| S  | 9.101053000  | 2.955566000 | 10.495842000 |
| S  | 8.780075000  | 3.472808000 | 13.583168000 |
| O  | 9.258954000  | 6.019217000 | 11.604137000 |
| O  | 9.721819000  | 4.311161000 | 7.838775000  |
| O  | 10.243424000 | 6.864537000 | 8.858217000  |
| O  | 11.386927000 | 4.884960000 | 10.301417000 |
| N  | 10.893055000 | 2.497825000 | 12.382148000 |
| C  | 10.848580000 | 3.830865000 | 7.498342000  |
| C  | 9.740506000  | 7.166289000 | 11.857671000 |
| C  | 11.192782000 | 2.551670000 | 13.721927000 |
| C  | 10.890337000 | 3.298379000 | 6.093072000  |
| H  | 10.091231000 | 2.565384000 | 5.953377000  |
| H  | 11.847835000 | 2.836998000 | 5.846111000  |
| H  | 10.697770000 | 4.113051000 | 5.388594000  |
| C  | 9.690974000  | 2.947178000 | 12.164495000 |
| C  | 10.154258000 | 3.041526000 | 14.552288000 |
| C  | 12.014987000 | 3.750886000 | 8.282666000  |
| H  | 12.863423000 | 3.257048000 | 7.820769000  |
| C  | 10.519915000 | 7.895830000 | 9.568822000  |
| C  | 10.304431000 | 8.073334000 | 10.938445000 |
| H  | 10.630964000 | 9.022848000 | 11.349594000 |
| C  | 9.696850000  | 7.540785000 | 13.312576000 |
| H  | 8.732893000  | 7.253375000 | 13.738923000 |
| H  | 9.876016000  | 8.603870000 | 13.482324000 |
| H  | 10.459692000 | 6.968396000 | 13.851405000 |
| C  | 12.226186000 | 4.250161000 | 9.571960000  |
| C  | 11.534222000 | 2.736460000 | 16.478798000 |
| H  | 11.682448000 | 2.801138000 | 17.552982000 |
| C  | 11.154432000 | 9.009016000 | 8.784285000  |
| H  | 12.087914000 | 8.656178000 | 8.336723000  |
| H  | 11.363169000 | 9.886637000 | 9.397866000  |
| H  | 10.499453000 | 9.297121000 | 7.957375000  |
| C  | 12.569288000 | 2.250564000 | 15.665223000 |

|    |              |              |              |
|----|--------------|--------------|--------------|
| H  | 13.506726000 | 1.944171000  | 16.120308000 |
| C  | 12.409269000 | 2.153992000  | 14.293230000 |
| H  | 13.198439000 | 1.773550000  | 13.651427000 |
| C  | 10.320893000 | 3.135285000  | 15.935023000 |
| H  | 9.523621000  | 3.508420000  | 16.570976000 |
| C  | 13.555556000 | 4.036414000  | 10.234254000 |
| H  | 13.933234000 | 4.982010000  | 10.631181000 |
| H  | 14.295426000 | 3.602901000  | 9.559592000  |
| H  | 13.411693000 | 3.365847000  | 11.087785000 |
| Ru | 6.964699000  | 3.863433000  | 10.124355000 |
| S  | 7.289120000  | 6.073917000  | 9.343374000  |
| S  | 7.610154000  | 5.556121000  | 6.256175000  |
| O  | 7.131189000  | 3.010310000  | 8.235106000  |
| O  | 6.668358000  | 4.718360000  | 12.000472000 |
| O  | 6.146741000  | 2.164967000  | 10.981031000 |
| O  | 5.003238000  | 4.144553000  | 9.537847000  |
| N  | 5.497240000  | 6.531597000  | 7.456920000  |
| C  | 5.541603000  | 5.198674000  | 12.340906000 |
| C  | 6.649618000  | 1.863249000  | 7.981564000  |
| C  | 5.197586000  | 6.477581000  | 6.117131000  |
| C  | 5.499856000  | 5.731182000  | 13.746167000 |
| H  | 6.298983000  | 6.464157000  | 13.885853000 |
| H  | 4.542371000  | 6.192592000  | 13.993117000 |
| H  | 5.692397000  | 4.916516000  | 14.450660000 |
| C  | 6.699272000  | 6.082175000  | 7.674700000  |
| C  | 6.236098000  | 5.987467000  | 5.286905000  |
| C  | 4.375196000  | 5.278658000  | 11.556585000 |
| H  | 3.526767000  | 5.772510000  | 12.018480000 |
| C  | 5.870231000  | 1.133687000  | 10.270416000 |
| C  | 6.085694000  | 0.956199000  | 8.900787000  |
| H  | 5.759142000  | 0.006694000  | 8.489631000  |
| C  | 6.693243000  | 1.488779000  | 6.526652000  |
| H  | 7.657198000  | 1.776180000  | 6.100294000  |
| H  | 6.514053000  | 0.425700000  | 6.356885000  |
| H  | 5.930405000  | 2.061195000  | 5.987847000  |
| C  | 4.163988000  | 4.779368000  | 10.267298000 |
| C  | 4.856292000  | 6.292425000  | 3.360265000  |
| H  | 4.708121000  | 6.227603000  | 2.286083000  |
| C  | 5.235712000  | 0.020496000  | 11.054946000 |
| H  | 4.302239000  | 0.373337000  | 11.502524000 |
| H  | 5.026958000  | -0.857114000 | 10.441355000 |
| H  | 5.890698000  | -0.267627000 | 11.881844000 |
| C  | 3.821237000  | 6.778573000  | 4.173705000  |
| H  | 2.883867000  | 7.085019000  | 3.718518000  |
| C  | 3.981185000  | 6.875328000  | 5.545694000  |
| H  | 3.192025000  | 7.255968000  | 6.187391000  |
| C  | 6.069535000  | 5.893523000  | 3.904174000  |
| H  | 6.866795000  | 5.520182000  | 3.268327000  |
| C  | 2.834615000  | 4.993114000  | 9.605010000  |
| H  | 2.456931000  | 4.047516000  | 9.208096000  |

|   |             |             |              |
|---|-------------|-------------|--------------|
| H | 2.094751000 | 5.426639000 | 10.279671000 |
| H | 2.978479000 | 5.663671000 | 8.751471000  |

---

**CH<sub>3</sub>OH (S=0)**

---

|                                              |                             |
|----------------------------------------------|-----------------------------|
| Zero-point correction=                       | 0.051606 (Hartree/Particle) |
| Thermal correction to Energy=                | 0.054900                    |
| Thermal correction to Enthalpy=              | 0.055844                    |
| Thermal correction to Gibbs Free Energy=     | 0.028897                    |
| Sum of electronic and zero-point Energies=   | -115.652007                 |
| Sum of electronic and thermal Energies=      | -115.648712                 |
| Sum of electronic and thermal Enthalpies=    | -115.647768                 |
| Sum of electronic and thermal Free Energies= | -115.674715                 |

---

Cartesian Coordinates

---

|   |             |              |              |
|---|-------------|--------------|--------------|
| O | 5.588578000 | 9.871936000  | 16.179855000 |
| H | 6.410919000 | 9.375261000  | 16.193031000 |
| C | 5.565805000 | 10.614162000 | 14.984199000 |
| H | 5.590385000 | 9.984378000  | 14.081729000 |
| H | 6.386693000 | 11.344052000 | 14.910763000 |
| H | 4.626768000 | 11.171753000 | 14.971859000 |

---

*B. Optimized Cartesian coordinates using (U)B3LYP density functional for the free energy calculation.*

---

**DTBT (S=0)**

---

|                                              |                             |
|----------------------------------------------|-----------------------------|
| Zero-point correction=                       | 0.187545 (Hartree/Particle) |
| Thermal correction to Energy=                | 0.204348                    |
| Thermal correction to Enthalpy=              | 0.205292                    |
| Thermal correction to Gibbs Free Energy=     | 0.139422                    |
| Sum of electronic and zero-point Energies=   | -2240.397788                |
| Sum of electronic and thermal Energies=      | -2240.380986                |
| Sum of electronic and thermal Enthalpies=    | -2240.380042                |
| Sum of electronic and thermal Free Energies= | -2240.445912                |

---

Cartesian Coordinates

---

|   |             |              |             |
|---|-------------|--------------|-------------|
| S | 7.077469000 | 10.304257000 | 4.354979000 |
| N | 7.800589000 | 11.344377000 | 6.657338000 |
| C | 8.230948000 | 12.226989000 | 5.674130000 |
| C | 8.305912000 | 12.632272000 | 3.256930000 |
| H | 8.075404000 | 12.332915000 | 2.239872000 |

|   |             |              |              |
|---|-------------|--------------|--------------|
| C | 8.914588000 | 13.426034000 | 5.911851000  |
| H | 9.139789000 | 13.715569000 | 6.932565000  |
| C | 7.201431000 | 10.327235000 | 6.135051000  |
| C | 7.933771000 | 11.843086000 | 4.345221000  |
| C | 8.985576000 | 13.821647000 | 3.513761000  |
| H | 9.285585000 | 14.452228000 | 2.682585000  |
| C | 9.286382000 | 14.213574000 | 4.827850000  |
| H | 9.816734000 | 15.145091000 | 4.999324000  |
| S | 6.469305000 | 8.390904000  | 11.644214000 |
| N | 5.748301000 | 7.349737000  | 9.341695000  |
| C | 5.317972000 | 6.467045000  | 10.324855000 |
| C | 5.241973000 | 6.062207000  | 12.742101000 |
| H | 5.471729000 | 6.361928000  | 13.759222000 |
| C | 4.635285000 | 5.267479000  | 10.087012000 |
| H | 4.410854000 | 4.977569000  | 9.066235000  |
| C | 6.346470000 | 8.367385000  | 9.864125000  |
| C | 5.614144000 | 6.851433000  | 11.653847000 |
| C | 4.563266000 | 4.872313000  | 12.485145000 |
| H | 4.263240000 | 4.241695000  | 13.316287000 |
| C | 4.263440000 | 4.479911000  | 11.170973000 |
| H | 3.733819000 | 3.547995000  | 10.999406000 |
| S | 7.040574000 | 9.716791000  | 8.965332000  |
| S | 6.506994000 | 8.978208000  | 7.033814000  |

---

$L^\bullet(S=1/2)$

---

|                                              |                             |
|----------------------------------------------|-----------------------------|
| Zero-point correction=                       | 0.092216 (Hartree/Particle) |
| Thermal correction to Energy=                | 0.099852                    |
| Thermal correction to Enthalpy=              | 0.100796                    |
| Thermal correction to Gibbs Free Energy=     | 0.058407                    |
| Sum of electronic and zero-point Energies=   | -1120.175938                |
| Sum of electronic and thermal Energies=      | -1120.168302                |
| Sum of electronic and thermal Enthalpies=    | -1120.167358                |
| Sum of electronic and thermal Free Energies= | -1120.209747                |

---

Cartesian Coordinates

---

|   |             |              |             |
|---|-------------|--------------|-------------|
| S | 7.118050000 | 10.406238000 | 4.056506000 |
| N | 7.793849000 | 11.351471000 | 6.427065000 |
| C | 8.231798000 | 12.243050000 | 5.503469000 |
| C | 8.372970000 | 12.770627000 | 3.101285000 |
| H | 8.172679000 | 12.529271000 | 2.062931000 |
| C | 8.917956000 | 13.440496000 | 5.817120000 |
| H | 9.113200000 | 13.673124000 | 6.858074000 |
| C | 7.181139000 | 10.314483000 | 5.866602000 |
| C | 7.964259000 | 11.918471000 | 4.131710000 |
| C | 9.044669000 | 13.938983000 | 3.441881000 |
| H | 9.369436000 | 14.612301000 | 2.654450000 |



|   |             |              |             |
|---|-------------|--------------|-------------|
| C | 9.315559000 | 14.272109000 | 4.790042000 |
| H | 9.842657000 | 15.194298000 | 5.012349000 |
| S | 6.501129000 | 9.001972000  | 6.682701000 |

---

A (S=0)

---

|                                              |                             |
|----------------------------------------------|-----------------------------|
| Zero-point correction=                       | 0.645176 (Hartree/Particle) |
| Thermal correction to Energy=                | 0.699906                    |
| Thermal correction to Enthalpy=              | 0.700851                    |
| Thermal correction to Gibbs Free Energy=     | 0.551901                    |
| Sum of electronic and zero-point Energies=   | -3808.693371                |
| Sum of electronic and thermal Energies=      | -3808.638640                |
| Sum of electronic and thermal Enthalpies=    | -3808.637696                |
| Sum of electronic and thermal Free Energies= | -3808.786646                |

---

Cartesian Coordinates

---

|    |             |              |             |
|----|-------------|--------------|-------------|
| Ru | 5.974642000 | 7.030006000  | 6.906916000 |
| S  | 7.580066000 | 10.240213000 | 4.549131000 |
| O  | 4.311920000 | 8.269089000  | 6.768131000 |
| O  | 4.641739000 | 5.441948000  | 6.805881000 |
| O  | 6.086870000 | 6.823639000  | 4.860895000 |
| O  | 7.592342000 | 5.694860000  | 7.026663000 |
| N  | 7.663066000 | 11.444134000 | 6.869743000 |
| C  | 7.767970000 | 12.451737000 | 5.901456000 |
| C  | 4.995297000 | 4.253358000  | 6.494562000 |
| C  | 7.496126000 | 4.465387000  | 6.719637000 |
| C  | 3.713381000 | 8.518489000  | 5.673757000 |
| C  | 4.103346000 | 8.096300000  | 4.385422000 |
| H  | 3.472764000 | 8.409775000  | 3.562198000 |
| C  | 7.882342000 | 12.848389000 | 3.479795000 |
| H  | 7.884623000 | 12.469804000 | 2.462799000 |
| C  | 7.858202000 | 13.830030000 | 6.141866000 |
| H  | 7.831500000 | 14.206979000 | 7.153483000 |
| C  | 5.214698000 | 7.304700000  | 4.057555000 |
| C  | 5.461321000 | 6.948887000  | 2.604505000 |
| H  | 6.460921000 | 7.285256000  | 2.310205000 |
| H  | 4.721646000 | 7.389998000  | 1.933615000 |
| H  | 5.444697000 | 5.859876000  | 2.490927000 |
| C  | 7.547735000 | 10.260339000 | 6.297308000 |
| C  | 7.767336000 | 11.980966000 | 4.569009000 |
| C  | 7.983914000 | 14.210860000 | 3.738268000 |
| H  | 8.070949000 | 14.907626000 | 2.910130000 |
| C  | 3.838714000 | 3.318882000  | 6.198784000 |
| H  | 3.268229000 | 3.710048000  | 5.349942000 |
| H  | 3.159018000 | 3.296041000  | 7.056897000 |
| H  | 4.166828000 | 2.302491000  | 5.971679000 |
| C  | 2.458046000 | 9.354486000  | 5.823297000 |

|    |              |              |              |
|----|--------------|--------------|--------------|
| H  | 1.733480000  | 8.806518000  | 6.435010000  |
| H  | 1.999880000  | 9.600669000  | 4.863340000  |
| H  | 2.697622000  | 10.278489000 | 6.358854000  |
| C  | 7.965570000  | 14.692454000 | 5.058032000  |
| H  | 8.034609000  | 15.761070000 | 5.237437000  |
| C  | 8.816214000  | 3.719322000  | 6.686321000  |
| H  | 9.496509000  | 4.223108000  | 5.992454000  |
| H  | 8.703238000  | 2.675579000  | 6.386229000  |
| H  | 9.281140000  | 3.757532000  | 7.677215000  |
| C  | 6.307355000  | 3.754231000  | 6.438017000  |
| H  | 6.419221000  | 2.709409000  | 6.174215000  |
| S  | 5.963428000  | 8.455176000  | 11.452286000 |
| N  | 5.880585000  | 7.251372000  | 9.131631000  |
| C  | 5.775828000  | 6.243724000  | 10.099845000 |
| C  | 5.661543000  | 5.846929000  | 12.521504000 |
| H  | 5.659186000  | 6.225468000  | 13.538517000 |
| C  | 5.685838000  | 4.865419000  | 9.859381000  |
| H  | 5.712653000  | 4.488481000  | 8.847772000  |
| C  | 5.995799000  | 8.435191000  | 9.704119000  |
| C  | 5.776405000  | 6.714414000  | 11.432327000 |
| C  | 5.560179000  | 4.484453000  | 12.262967000 |
| H  | 5.473239000  | 3.787635000  | 13.091073000 |
| C  | 5.578613000  | 4.002930000  | 10.943179000 |
| H  | 5.509768000  | 2.934312000  | 10.763715000 |
| Ru | 7.569090000  | 11.665468000 | 9.094365000  |
| O  | 9.231704000  | 10.426171000 | 9.233067000  |
| O  | 8.902152000  | 13.253398000 | 9.195332000  |
| O  | 7.457102000  | 11.871840000 | 11.140406000 |
| O  | 5.951544000  | 13.000752000 | 8.974644000  |
| C  | 8.548707000  | 14.441986000 | 9.506774000  |
| C  | 6.047872000  | 14.230235000 | 9.281616000  |
| C  | 9.830148000  | 10.176471000 | 10.327415000 |
| C  | 9.440212000  | 10.598518000 | 11.615810000 |
| H  | 10.070654000 | 10.284717000 | 12.439019000 |
| C  | 8.329062000  | 11.390381000 | 11.943729000 |
| C  | 8.082446000  | 11.746031000 | 13.396824000 |
| H  | 7.082684000  | 11.410012000 | 13.690965000 |
| H  | 8.821885000  | 11.304505000 | 14.067701000 |
| H  | 8.099500000  | 12.835016000 | 13.510610000 |
| C  | 9.705367000  | 15.376283000 | 9.802814000  |
| H  | 10.275559000 | 14.985047000 | 10.651823000 |
| H  | 10.385299000 | 15.398988000 | 8.944885000  |
| H  | 9.377358000  | 16.392732000 | 10.029810000 |
| C  | 11.085362000 | 9.340300000  | 10.177791000 |
| H  | 11.810224000 | 9.888464000  | 9.566598000  |
| H  | 11.543204000 | 9.093523000  | 11.137751000 |
| H  | 10.845764000 | 8.416639000  | 9.641659000  |
| C  | 4.727798000  | 14.976307000 | 9.315265000  |
| H  | 4.048883000  | 14.474472000 | 10.011926000 |
| H  | 4.841220000  | 16.020892000 | 9.612233000  |

|   |             |              |             |
|---|-------------|--------------|-------------|
| H | 4.260963000 | 14.935128000 | 8.325411000 |
| C | 7.236701000 | 14.941275000 | 9.563231000 |
| H | 7.124944000 | 15.986104000 | 9.827059000 |
| S | 6.097016000 | 9.934003000  | 8.769385000 |
| S | 7.446281000 | 8.761553000  | 7.232143000 |

---

**1 (S=1/2)**

---

|                                              |                             |
|----------------------------------------------|-----------------------------|
| Zero-point correction=                       | 0.375332 (Hartree/Particle) |
| Thermal correction to Energy=                | 0.406413                    |
| Thermal correction to Enthalpy=              | 0.407357                    |
| Thermal correction to Gibbs Free Energy=     | 0.309553                    |
| Sum of electronic and zero-point Energies=   | -2020.038389                |
| Sum of electronic and thermal Energies=      | -2020.007308                |
| Sum of electronic and thermal Enthalpies=    | -2020.006364                |
| Sum of electronic and thermal Free Energies= | -2020.104167                |

---

Cartesian Coordinates

---

|    |             |              |              |
|----|-------------|--------------|--------------|
| Ru | 4.709230000 | 8.053584000  | 16.458891000 |
| S  | 3.729641000 | 6.035721000  | 16.904672000 |
| S  | 2.738480000 | 6.106229000  | 13.907342000 |
| O  | 3.147096000 | 8.822628000  | 15.379727000 |
| O  | 5.560549000 | 7.436202000  | 14.686136000 |
| O  | 5.741755000 | 10.039124000 | 16.242590000 |
| H  | 6.516193000 | 9.996940000  | 16.821248000 |
| O  | 6.407764000 | 7.509687000  | 17.508270000 |
| O  | 3.963931000 | 8.810250000  | 18.219114000 |
| N  | 2.536066000 | 4.077686000  | 15.562421000 |
| C  | 1.959417000 | 3.675573000  | 14.374640000 |
| C  | 1.420339000 | 4.361261000  | 12.081526000 |
| H  | 1.429180000 | 5.102748000  | 11.288420000 |
| C  | 1.969028000 | 4.641098000  | 13.336277000 |
| C  | 2.122756000 | 9.385189000  | 15.909307000 |
| C  | 0.857910000 | 3.104123000  | 11.871880000 |
| H  | 0.425314000 | 2.867848000  | 10.904008000 |
| C  | 2.984060000 | 5.296793000  | 15.491183000 |
| C  | 6.625119000 | 6.730353000  | 14.610682000 |
| C  | 2.456835000 | 9.782286000  | 19.735036000 |
| H  | 2.408412000 | 8.889622000  | 20.367287000 |
| H  | 1.501451000 | 10.307799000 | 19.784717000 |
| H  | 3.244202000 | 10.423604000 | 20.143424000 |
| C  | 8.407983000 | 6.383948000  | 18.018943000 |
| H  | 8.758182000 | 7.264574000  | 18.566184000 |
| H  | 9.258368000 | 5.884367000  | 17.551257000 |
| H  | 7.958124000 | 5.708189000  | 18.754374000 |
| C  | 2.822315000 | 9.372070000  | 18.324486000 |
| C  | 1.063809000 | 9.803455000  | 14.912911000 |

|   |             |              |              |
|---|-------------|--------------|--------------|
| H | 1.521392000 | 10.411336000 | 14.126141000 |
| H | 0.251080000 | 10.364901000 | 15.377307000 |
| H | 0.652841000 | 8.910229000  | 14.430444000 |
| C | 0.842621000 | 2.139003000  | 12.894821000 |
| H | 0.397774000 | 1.166577000  | 12.704798000 |
| C | 7.349822000 | 6.793500000  | 17.017352000 |
| C | 6.100625000 | 10.542865000 | 14.944669000 |
| H | 6.883995000 | 9.936287000  | 14.481532000 |
| H | 6.424988000 | 11.584962000 | 15.028587000 |
| H | 5.197219000 | 10.481850000 | 14.339142000 |
| C | 6.962298000 | 6.259718000  | 13.212573000 |
| H | 6.169525000 | 5.589745000  | 12.863260000 |
| H | 7.919890000 | 5.738031000  | 13.164229000 |
| H | 6.979726000 | 7.115936000  | 12.530960000 |
| C | 1.920934000 | 9.636029000  | 17.274987000 |
| H | 0.990426000 | 10.119981000 | 17.545811000 |
| C | 1.388163000 | 2.413737000  | 14.142662000 |
| H | 1.384182000 | 1.680421000  | 14.942409000 |
| C | 7.474115000 | 6.384211000  | 15.678340000 |
| H | 8.335718000 | 5.774400000  | 15.434824000 |

---

**1'** ( $S=1/2$ )

---

|                                              |                             |
|----------------------------------------------|-----------------------------|
| Zero-point correction=                       | 0.321968 (Hartree/Particle) |
| Thermal correction to Energy=                | 0.348483                    |
| Thermal correction to Enthalpy=              | 0.349427                    |
| Thermal correction to Gibbs Free Energy=     | 0.263130                    |
| Sum of electronic and zero-point Energies=   | -1904.366553                |
| Sum of electronic and thermal Energies=      | -1904.340038                |
| Sum of electronic and thermal Enthalpies=    | -1904.339093                |
| Sum of electronic and thermal Free Energies= | -1904.425391                |

---

Cartesian Coordinates

---

|    |              |             |              |
|----|--------------|-------------|--------------|
| Ru | 10.298171000 | 4.579099000 | 6.177399000  |
| S  | 10.190625000 | 6.611401000 | 4.739583000  |
| O  | 10.762849000 | 2.857641000 | 7.219001000  |
| O  | 9.783851000  | 3.451555000 | 4.552251000  |
| C  | 8.905829000  | 1.654253000 | 3.323255000  |
| H  | 8.012150000  | 2.226972000 | 3.056105000  |
| H  | 8.648207000  | 0.596645000 | 3.404209000  |
| H  | 9.627534000  | 1.787770000 | 2.510878000  |
| O  | 10.821440000 | 5.672345000 | 7.810370000  |
| C  | 10.335432000 | 1.694540000 | 6.900474000  |
| O  | 8.377484000  | 4.389722000 | 6.872316000  |
| C  | 8.814759000  | 5.264782000 | 9.054805000  |
| H  | 8.353695000  | 5.437810000 | 10.019440000 |
| C  | 10.625078000 | 0.618656000 | 7.925248000  |

|   |              |              |              |
|---|--------------|--------------|--------------|
| H | 11.708046000 | 0.520749000  | 8.055745000  |
| H | 10.213022000 | -0.350766000 | 7.639126000  |
| H | 10.210883000 | 0.917603000  | 8.893247000  |
| C | 6.570905000  | 4.330771000  | 8.373967000  |
| H | 5.916136000  | 4.945143000  | 7.746678000  |
| H | 6.318831000  | 4.500945000  | 9.422301000  |
| H | 6.374841000  | 3.285337000  | 8.117048000  |
| C | 10.804383000 | 6.477467000  | 10.015504000 |
| H | 11.761624000 | 5.992546000  | 10.231460000 |
| H | 10.197291000 | 6.500097000  | 10.922376000 |
| H | 11.025817000 | 7.504161000  | 9.706021000  |
| C | 8.014257000  | 4.664405000  | 8.064947000  |
| C | 10.119892000 | 5.750106000  | 8.880080000  |
| C | 9.486076000  | 2.208707000  | 4.605011000  |
| C | 11.852405000 | 6.174727000  | 4.675755000  |
| C | 9.684415000  | 1.354107000  | 5.703507000  |
| H | 9.392907000  | 0.318409000  | 5.579349000  |
| S | 13.235461000 | 6.939787000  | 3.889384000  |
| N | 12.165315000 | 5.080630000  | 5.352575000  |
| C | 13.513422000 | 4.773226000  | 5.331930000  |
| C | 15.654733000 | 5.516366000  | 4.415661000  |
| H | 16.240142000 | 6.211218000  | 3.821956000  |
| C | 14.277470000 | 5.679628000  | 4.560722000  |
| C | 16.263296000 | 4.437739000  | 5.057703000  |
| H | 17.335021000 | 4.295081000  | 4.958883000  |
| C | 15.509509000 | 3.540317000  | 5.830595000  |
| H | 16.008088000 | 2.711768000  | 6.324634000  |
| C | 14.134315000 | 3.696239000  | 5.975623000  |
| H | 13.536293000 | 3.018086000  | 6.574838000  |

---

**2 (S=0)**

---

|                                              |                             |
|----------------------------------------------|-----------------------------|
| Zero-point correction=                       | 0.645403 (Hartree/Particle) |
| Thermal correction to Energy=                | 0.698124                    |
| Thermal correction to Enthalpy=              | 0.699068                    |
| Thermal correction to Gibbs Free Energy=     | 0.554635                    |
| Sum of electronic and zero-point Energies=   | -3808.722135                |
| Sum of electronic and thermal Energies=      | -3808.669414                |
| Sum of electronic and thermal Enthalpies=    | -3808.668470                |
| Sum of electronic and thermal Free Energies= | -3808.812903                |

---

Cartesian Coordinates

---

|    |             |             |              |
|----|-------------|-------------|--------------|
| Ru | 9.441846000 | 5.191830000 | 9.688982000  |
| S  | 9.125390000 | 2.991729000 | 10.538086000 |
| S  | 8.774213000 | 3.493512000 | 13.654398000 |
| O  | 9.302436000 | 6.143847000 | 11.534158000 |
| O  | 9.719176000 | 4.275588000 | 7.841176000  |

|    |              |             |              |
|----|--------------|-------------|--------------|
| O  | 10.200850000 | 6.867697000 | 8.769506000  |
| O  | 11.417593000 | 4.951005000 | 10.204702000 |
| N  | 10.812952000 | 2.349418000 | 12.473278000 |
| C  | 10.848938000 | 3.839482000 | 7.449464000  |
| C  | 9.702968000  | 7.333760000 | 11.724793000 |
| C  | 11.086763000 | 2.330741000 | 13.827181000 |
| C  | 10.846965000 | 3.266177000 | 6.046592000  |
| H  | 10.062447000 | 2.508219000 | 5.964716000  |
| H  | 11.807209000 | 2.824329000 | 5.774364000  |
| H  | 10.605572000 | 4.061286000 | 5.333392000  |
| C  | 9.670055000  | 2.918995000 | 12.232444000 |
| C  | 10.082180000 | 2.898360000 | 14.649676000 |
| C  | 12.058501000 | 3.841900000 | 8.175225000  |
| H  | 12.914546000 | 3.394522000 | 7.685296000  |
| C  | 10.437377000 | 7.961985000 | 9.397868000  |
| C  | 10.212408000 | 8.224775000 | 10.753038000 |
| H  | 10.481670000 | 9.213754000 | 11.103358000 |
| C  | 9.629548000  | 7.797221000 | 13.165477000 |
| H  | 8.689123000  | 7.459995000 | 13.607992000 |
| H  | 9.717338000  | 8.881449000 | 13.260540000 |
| H  | 10.442117000 | 7.328731000 | 13.732389000 |
| C  | 12.278489000 | 4.371124000 | 9.453037000  |
| C  | 11.378600000 | 2.395349000 | 16.599646000 |
| H  | 11.507094000 | 2.412342000 | 17.678003000 |
| C  | 11.026261000 | 9.045584000 | 8.519074000  |
| H  | 11.968004000 | 8.689909000 | 8.088467000  |
| H  | 11.208622000 | 9.972182000 | 9.066333000  |
| H  | 10.345613000 | 9.246241000 | 7.685592000  |
| C  | 12.382743000 | 1.830553000 | 15.790292000 |
| H  | 13.273521000 | 1.418641000 | 16.255069000 |
| C  | 12.246288000 | 1.792826000 | 14.409500000 |
| H  | 13.008365000 | 1.357782000 | 13.771158000 |
| C  | 10.222395000 | 2.931921000 | 16.041574000 |
| H  | 9.452187000  | 3.364870000 | 16.672333000 |
| C  | 13.653397000 | 4.267647000 | 10.075937000 |
| H  | 13.984620000 | 5.259365000 | 10.399078000 |
| H  | 14.390087000 | 3.842766000 | 9.391595000  |
| H  | 13.584655000 | 3.638451000 | 10.969421000 |
| Ru | 6.948393000  | 3.837575000 | 10.150208000 |
| S  | 7.264849000  | 6.037677000 | 9.301105000  |
| S  | 7.616007000  | 5.535870000 | 6.184795000  |
| O  | 7.087804000  | 2.885559000 | 8.305032000  |
| O  | 6.671063000  | 4.753815000 | 11.998015000 |
| O  | 6.189388000  | 2.161707000 | 11.069682000 |
| O  | 4.972646000  | 4.078400000 | 9.634488000  |
| N  | 5.577272000  | 6.679970000 | 7.365917000  |
| C  | 5.541300000  | 5.189920000 | 12.389728000 |
| C  | 6.687272000  | 1.695646000 | 8.114395000  |
| C  | 5.303458000  | 6.698645000 | 6.012015000  |
| C  | 5.543274000  | 5.763222000 | 13.792600000 |

|   |             |              |              |
|---|-------------|--------------|--------------|
| H | 6.327792000 | 6.521182000  | 13.874477000 |
| H | 4.583030000 | 6.205070000  | 14.064830000 |
| H | 5.784668000 | 4.968113000  | 14.505798000 |
| C | 6.720179000 | 6.110411000  | 7.606749000  |
| C | 6.308045000 | 6.131035000  | 5.189517000  |
| C | 4.331737000 | 5.187501000  | 11.663966000 |
| H | 3.475691000 | 5.634878000  | 12.153896000 |
| C | 5.952862000 | 1.067419000  | 10.441319000 |
| C | 6.177832000 | 0.804631000  | 9.086150000  |
| H | 5.908572000 | -0.184348000 | 8.735828000  |
| C | 6.760693000 | 1.232186000  | 6.673711000  |
| H | 7.701118000 | 1.569413000  | 6.231196000  |
| H | 6.672904000 | 0.147958000  | 6.578648000  |
| H | 5.948125000 | 1.700676000  | 6.106799000  |
| C | 4.111749000 | 4.658279000  | 10.386154000 |
| C | 5.011623000 | 6.634049000  | 3.239549000  |
| H | 4.883129000 | 6.617058000  | 2.161192000  |
| C | 5.363979000 | -0.016180000 | 11.320112000 |
| H | 4.422235000 | 0.339494000  | 11.750720000 |
| H | 5.181618000 | -0.942778000 | 10.772852000 |
| H | 6.044626000 | -0.216838000 | 12.153594000 |
| C | 4.007477000 | 7.198836000  | 4.048905000  |
| H | 3.116697000 | 7.610746000  | 3.584129000  |
| C | 4.143931000 | 7.236557000  | 5.429697000  |
| H | 3.381852000 | 7.671596000  | 6.068041000  |
| C | 6.167830000 | 6.097479000  | 3.797619000  |
| H | 6.938038000 | 5.664531000  | 3.166859000  |
| C | 2.736841000 | 4.761755000  | 9.763254000  |
| H | 2.405618000 | 3.770037000  | 9.440113000  |
| H | 2.000151000 | 5.186636000  | 10.447596000 |
| H | 2.805583000 | 5.390953000  | 8.869771000  |

-----  
**CH<sub>3</sub>OH (S=0)**  
 -----

|                                              |                             |
|----------------------------------------------|-----------------------------|
| Zero-point correction=                       | 0.051405 (Hartree/Particle) |
| Thermal correction to Energy=                | 0.054706                    |
| Thermal correction to Enthalpy=              | 0.055651                    |
| Thermal correction to Gibbs Free Energy=     | 0.028678                    |
| Sum of electronic and zero-point Energies=   | -115.672558                 |
| Sum of electronic and thermal Energies=      | -115.669256                 |
| Sum of electronic and thermal Enthalpies=    | -115.668312                 |
| Sum of electronic and thermal Free Energies= | -115.695285                 |

-----  
 Cartesian Coordinates  
 -----

|   |             |              |              |
|---|-------------|--------------|--------------|
| O | 5.588798000 | 9.867991000  | 16.181447000 |
| H | 6.415664000 | 9.370349000  | 16.200712000 |
| C | 5.563968000 | 10.618419000 | 14.978379000 |

|   |             |              |              |
|---|-------------|--------------|--------------|
| H | 5.589157000 | 9.984539000  | 14.079112000 |
| H | 6.387961000 | 11.344849000 | 14.911202000 |
| H | 4.623602000 | 11.175394000 | 14.970583000 |

---



## References

- (1) T. Kobayashi, Y. Nishina, K. G. Shimizu and G. P. Satô, *Chem. Lett.*, 1988, 1137-1140.
- (2) N. Ahmad, J. J. Levison, S. D. Robinson, M. F. Uttley, E. R. Wonchoba and G. W. Parshall, *Inorg. Synth*, 2007, **15**, 45-64.
- (3) (a) G. M. Sheldrick, *Acta Crystallogr., Sect. A Found. Crystallogr.* 2015, **71**, 3-8. (b) O. V. Dolomanov, L.J.Bourhis, R.J.Gildea, J.A.K.Howard, H. Puschmann, *J. Appl. Cryst.*, 2009, **42**, 339-341.
- (4) Y. Zhao and D. G. Truhlar, *Theor. Chem. Acc.*, 2008, **120**, 215-241.
- (5) C. Lee, W. Yang, R. G. Parr, *Phys. Rev. B* 1988, **37**, 785-789.
- (6) (a) D. Andrae, U. Haeussermann, M. Dolg, H. Stoll and H. Preuss, *Theor. Chim. Acta.*, 1990, **77**, 123-141. (b) P. Fuentealba, H. Preuss, H. Stoll and L. A. von Szentpaly, *Chem. Phys. Lett.*, 1989, **89**, 418-422.
- (7) M. J. Frisch, G. W. Trucks, H. B. Schlegel, G. E. Scuseria, M. A. Robb, J. R. Cheeseman, G. Scalmani, V. Barone, B. Mennucci, G. A. Petersson, H. Nakatsuji, M. Caricato, X. Li, H. P. Hratchian, A. F. Izmaylov, J. Bloino, G. Zheng, J. L. Sonnenberg, M. Hada, M. Ehara, K. Toyota, R. Fukuda, J. Hasegawa, M. Ishida, T. Nakajima, Y. Honda, O. Kitao, H. Nakai, T. Vreven, J. A. Montgomery Jr., J. E. Peralta, F. Ogliaro, M. Bearpark, J. J. Heyd, E. Brothers, K. N. Kudin, V. N. Staroverov, R. Kobayashi, J. Normand, K. Raghavachari, A. Rendell, J. C. Burant, S. S. Iyengar, J. Tomasi, M. Cossi, N. Rega, J. M. Millam, M. Klene, J. E. Knox, J. B. Cross, V. Bakken, C. Adamo, J. Jaramillo, R. Gomperts, R. E. Stratmann, O. Yazyev, A. J. Austin, R. Cammi, C. Pomelli, J. W. Ochterski, R. L. Martin, K. Morokuma, V. G. Zakrzewski, G. A. Voth, P. Salvador, J. J. Dannenberg, S. Dapprich, A. D. Daniels, O. Farkas, J. B. Foresman, J. V. Ortiz, J. Cioslowski and D. J. Fox, Gaussian, Inc.: Wallingford CT 2009.
- (8) G. A. Zhurko and D. A. Zhurko, *ChemCraft 1.6*, Plimus: San Diego, CA. Available at <http://www.chemcraftprog.com>.
- (9) S. Leonid, *Chemissian 1.7*, 2005-2010. Available at <http://www.chemissian.com>.
